# Supplementary material for: Molecular insights into RNA recognition and gene regulation by the TRIM-NHL protein Mei-P26
Source: Life Sci Alliance. 2022 May 5;5(8):e202201418. doi: 10.26508/lsa.202201418 (PMC9070667; doi:10.26508/lsa.202201418)
Supplement: Supplementary file 7 [file LSA-2022-01418_Supplemental_Data_1.xlsx]

## Sheet: Full-length Mei-P26
Chromosome	Start coordinate in chromosome	End coordinate in chromosome	Gene name/number	Strand
2L	75956	75990	FBgn0031213	+
2L	118803	118834	FBgn0031220	-
2L	122639	122672	FBgn0025683	-
2L	202756	202789	FBgn0016977	+
2L	409154	409185	FBgn0264855	-
2L	420637	420671	FBgn0002593	+
2L	443338	443369	FBgn0004583	+
2L	448737	448768	FBgn0015924	-
2L	823780	823811	FBgn0031285	+
2L	1114990	1115021	FBgn0016926	-
2L	1612517	1612548	FBgn0031351	+
2L	1706876	1706941	FBgn0011570	+
2L	1943325	1943356	FBgn0031374	+
2L	2137228	2137259	FBgn0004507	+
2L	2145104	2145135	FBgn0031390	-
2L	2225693	2225725	FBgn0031403	-
2L	2230950	2230982	FBgn0267378	+
2L	2770764	2770798	FBgn0031459	+
2L	2856644	2856677	FBgn0015521	+
2L	2856969	2857003	FBgn0015521	+
2L	3046743	3046775	FBgn0042627	+
2L	3046743	3046781	FBgn0042627	+
2L	3046743	3046775	FBgn0042627,FBgn0042627	+
2L	3046743	3046781	FBgn0042627,FBgn0042627	+
2L	3046796	3046860	FBgn0042627	+
2L	3046796	3046860	FBgn0042627,FBgn0042627	+
2L	3046824	3046860	FBgn0042627	+
2L	3046824	3046860	FBgn0042627,FBgn0042627	+
2L	3046827	3046860	FBgn0042627	+
2L	3358639	3358670	FBgn0085423	-
2L	4228452	4228486	FBgn0003941	+
2L	4380132	4380163	FBgn0026319	+
2L	4908870	4908901	FBgn0041150	-
2L	4948161	4948192	FBgn0015000	+
2L	4966439	4966470	FBgn0015834	-
2L	5012149	5012186	FBgn0016075	-
2L	5012189	5012240	FBgn0016075	-
2L	5012272	5012309	FBgn0016075	-
2L	5033742	5033774	FBgn0000299	+
2L	5036897	5036930	FBgn0000299	+
2L	5036979	5037014	FBgn0000299	+
2L	5037023	5037094	FBgn0000299	+
2L	5051209	5051243	FBgn0022023	-
2L	5056026	5056057	FBgn0031678	-
2L	5071804	5071836	FBgn0261608	+
2L	5071819	5071852	FBgn0261608	+
2L	5203026	5203057	FBgn0261836	+
2L	5206905	5206962	FBgn0261836	+
2L	5323546	5323579	FBgn0031698	-
2L	5530633	5530664	FBgn0031713	-
2L	5973213	5973251	FBgn0000308	-
2L	5973245	5973277	FBgn0000308	-
2L	5985478	5985524	FBgn0001942	+
2L	5985493	5985527	FBgn0001942	+
2L	6046818	6046850	FBgn0085208	-
2L	6046818	6046850	FBgn0085208,FBgn0029161	-
2L	6477234	6477270	FBgn0086357	-
2L	6767776	6767807	FBgn0031857	-
2L	6778626	6778657	FBgn0015776	-
2L	6778701	6778733	FBgn0015776	-
2L	6927527	6927559	FBgn0004838	+
2L	6927719	6927753	FBgn0004838	+
2L	6966854	6966890	FBgn0264922	-
2L	6997504	6997535	FBgn0031879	-
2L	7030511	7030545	FBgn0031882	-
2L	7069542	7069577	FBgn0031888	-
2L	7194936	7194969	FBgn0031896	-
2L	7693815	7693849	FBgn0041182	-
2L	7802024	7802056	FBgn0031951	+
2L	7820620	7820653	FBgn0261800	+
2L	7820681	7820745	FBgn0261800	+
2L	7820684	7820718	FBgn0261800	+
2L	7825644	7825698	FBgn0020618	-
2L	7832412	7832443	FBgn0004177	+
2L	7885008	7885039	FBgn0031961	-
2L	7986804	7986836	FBgn0031969	-
2L	7999766	7999797	FBgn0031972	-
2L	8041931	8041966	FBgn0031980	-
2L	8041935	8041970	FBgn0031980	-
2L	8063874	8063907	FBgn0011230	-
2L	8089302	8089333	FBgn0261822	+
2L	8108163	8108194	FBgn0261822	+
2L	8109396	8109429	FBgn0261822	+
2L	8127422	8127453	FBgn0031988	+
2L	8133797	8133828	FBgn0031988	+
2L	8189536	8189568	FBgn0264953	+
2L	8221210	8221243	FBgn0032006	-
2L	8306555	8306587	FBgn0032014	+
2L	8313964	8313996	FBgn0032018	+
2L	8363723	8363757	FBgn0010265	-
2L	8370015	8370046	FBgn0260439	+
2L	8378400	8378433	FBgn0027094	-
2L	8388729	8388760	FBgn0032036	+
2L	8449717	8449749	FBgn0026718	-
2L	8485854	8485888	FBgn0262029	+
2L	8485855	8485888	FBgn0262029	+
2L	8540653	8540684	FBgn0028394	+
2L	8687277	8687309	FBgn0004914	-
2L	8943508	8943543	FBgn0032078	-
2L	9247133	9247170	FBgn0041092	+
2L	9331954	9331986	FBgn0010314	+
2L	9497301	9497332	FBgn0032120	+
2L	9896343	9896374	FBgn0004867	-
2L	9908446	9908477	FBgn0032156	-
2L	9917251	9917285	FBgn0025700	-
2L	9968382	9968417	FBgn0011272	+
2L	9968428	9968467	FBgn0011272	+
2L	10060025	10060080	FBgn0267727	+
2L	10202051	10202095	FBgn0005593	+
2L	10225737	10225768	FBgn0032196	-
2L	10254779	10254811	FBgn0032200	-
2L	10257951	10257982	FBgn0026379	-
2L	10363625	10363656	FBgn0003087	+
2L	10374202	10374235	FBgn0053303	-
2L	10392605	10392637	FBgn0267821	+
2L	10410371	10410439	FBgn0003942	+
2L	10410384	10410417	FBgn0003942	+
2L	10427957	10427993	FBgn0267330	+
2L	10493480	10493511	FBgn0086347	-
2L	10500256	10500287	FBgn0086347	-
2L	10511329	10511363	FBgn0267828	-
2L	10733334	10733366	FBgn0027868	-
2L	10854938	10854969	FBgn0027453	-
2L	10964912	10964986	FBgn0053129	-
2L	11009829	11009863	FBgn0032329	-
2L	11110773	11110804	FBgn0261983	+
2L	11119218	11119249	FBgn0027582	-
2L	11126932	11126963	FBgn0262647	+
2L	11523326	11523370	FBgn0028490	-
2L	11523343	11523379	FBgn0028490	-
2L	11615350	11615381	FBgn0015400	+
2L	11795209	11795242	FBgn0020309	-
2L	11829030	11829061	FBgn0264815	-
2L	12440531	12440564	FBgn0020443	+
2L	12708287	12708318	FBgn0032453	+
2L	12817078	12817109	FBgn0015399	-
2L	12817145	12817176	FBgn0015399	-
2L	12822397	12822428	FBgn0015399	-
2L	13184985	13185016	FBgn0032479	-
2L	13286903	13286934	FBgn0032499	+
2L	13371434	13371467	FBgn0032512	-
2L	13394322	13394359	FBgn0032518	-
2L	13394327	13394360	FBgn0032518	-
2L	13410381	13410412	FBgn0032521	+
2L	13503257	13503289	FBgn0023407	-
2L	13638665	13638699	FBgn0259984	+
2L	13898843	13898875	FBgn0019890	-
2L	14618931	14618962	FBgn0003016	-
2L	14618932	14618965	FBgn0003016	-
2L	15116046	15116078	FBgn0001978	+
2L	15727678	15727709	FBgn0010382	-
2L	16258235	16258266	FBgn0028515	+
2L	16354070	16354101	FBgn0028506	+
2L	16354970	16355056	FBgn0025678	-
2L	16355070	16355106	FBgn0025678	-
2L	16446744	16446775	FBgn0020416	+
2L	16723159	16723190	FBgn0027779	-
2L	17244932	17244963	FBgn0032629	-
2L	17417493	17417524	FBgn0011274	-
2L	17454746	17454777	FBgn0032638	-
2L	18140967	18140998	FBgn0041184	-
2L	18442575	18442611	FBgn0261597	-
2L	18534433	18534464	FBgn0085370	-
2L	18683764	18683798	FBgn0005617	-
2L	18703732	18703763	FBgn0032703	+
2L	18977536	18977570	FBgn0032731	-
2L	18977581	18977613	FBgn0032731	-
2L	18977904	18977935	FBgn0032731	-
2L	19008342	19008379	FBgn0086710	-
2L	19069600	19069633	FBgn0032751	+
2L	19122144	19122178	FBgn0002031	-
2L	19158523	19158554	FBgn0010300	+
2L	19810748	19810780	FBgn0263873	+
2L	19816466	19816498	FBgn0263873	+
2L	19959922	19959955	FBgn0032833	+
2L	20073362	20073393	FBgn0045064	+
2L	20647142	20647176	FBgn0032870	+
2L	20730486	20730518	FBgn0032880	-
2L	20747487	20747519	FBgn0262743	+
2L	20791241	20791272	FBgn0250785	-
2L	20797893	20797924	FBgn0032886	+
2L	21215157	21215189	FBgn0032935	-
2L	21282425	21282456	FBgn0032938	+
2L	21286157	21286188	FBgn0032940	-
2L	21304861	21304892	FBgn0032940	-
2L	21309313	21309344	FBgn0032940	-
2L	21319475	21319510	FBgn0284230	+
2L	21319475	21319510	FBgn0284230,FBgn0000370	+
2L	21357921	21357952	FBgn0032943	+
2L	21576992	21577026	FBgn0032949	+
2L	21577019	21577057	FBgn0032949	+
2L	21626874	21626949	FBgn0022893	-
2L	21626981	21627029	FBgn0022893	-
2L	21627137	21627170	FBgn0022893	-
2L	21678154	21678188	FBgn0000559	-
2L	21728187	21728218	FBgn0051619	+
2L	21753488	21753519	FBgn0086779	-
2L	22126421	22126452	FBgn0032974	+
2L	22128286	22128317	FBgn0025674	-
2L	22183850	22183881	FBgn0032981	+
2L	22354443	22354477	FBgn0039972	+
2L	22356317	22356349	FBgn0039972	+
2L	22362598	22362629	FBgn0039972	+
2L	22368033	22368064	FBgn0039972	+
2L	22368691	22368725	FBgn0039972	+
2L	22534813	22534884	FBgn0064225	-
2L	22534879	22534924	FBgn0064225	-
2L	22536348	22536379	FBgn0064225	-
2L	22940441	22940473	FBgn0002566	+
2L	22940557	22940591	FBgn0002566	+
2L	23173282	23173314	FBgn0039958	-
2R	518265	518300	FBgn0267428	+
2R	518268	518302	FBgn0267428	+
2R	1344180	1344216	FBgn0267398	-
2R	1982336	1982369	FBgn0263780	-
2R	3943331	3943362	FBgn0262124	-
2R	4187508	4187556	FBgn0262116	-
2R	4516052	4516089	FBgn0040007	-
2R	4720037	4720068	FBgn0026401	-
2R	4757964	4757995	FBgn0039994	+
2R	5654790	5654822	FBgn0027507	+
2R	5706211	5706248	FBgn0267978	-
2R	5706243	5706274	FBgn0267978	-
2R	5707259	5707292	FBgn0267978	-
2R	5707403	5707436	FBgn0267978	-
2R	5707874	5707905	FBgn0267978	-
2R	5726668	5726702	FBgn0267978	-
2R	5775163	5775194	FBgn0025693	-
2R	6012224	6012255	FBgn0264959	+
2R	6013980	6014023	FBgn0000043	-
2R	6164892	6164924	FBgn0000546	-
2R	6625249	6625282	FBgn0262736	-
2R	6625284	6625328	FBgn0262736	-
2R	6625335	6625368	FBgn0262736	-
2R	6652779	6652811	FBgn0029131	+
2R	6715590	6715622	FBgn0266525	-
2R	6715590	6715622	FBgn0266525,FBgn0033095	-
2R	6755950	6756015	FBgn0027066	+
2R	6757649	6757680	FBgn0033101	-
2R	6814695	6814729	FBgn0265003	+
2R	7018231	7018263	FBgn0029506	+
2R	7018265	7018299	FBgn0029506	+
2R	7018307	7018341	FBgn0029506	+
2R	7281533	7281567	FBgn0260991	+
2R	7390970	7391001	FBgn0033160	+
2R	7507419	7507452	FBgn0261397	+
2R	7698522	7698553	FBgn0033212	-
2R	7822169	7822201	FBgn0029093	-
2R	7920872	7920904	FBgn0015509	+
2R	7965735	7965768	FBgn0027548	+
2R	8078181	8078212	FBgn0020279	+
2R	8128927	8128959	FBgn0033266	+
2R	8134161	8134194	FBgn0005648	+
2R	8428419	8428450	FBgn0028836	+
2R	8903031	8903065	FBgn0004921	+
2R	8903071	8903104	FBgn0004921	+
2R	8952091	8952126	FBgn0033357	+
2R	9092740	9092772	FBgn0033373	-
2R	9209565	9209597	FBgn0262515	+
2R	9864724	9864755	FBgn0285962	-
2R	10073090	10073121	FBgn0033482	-
2R	10084037	10084068	FBgn0033483	+
2R	10108311	10108349	FBgn0004907	+
2R	10108423	10108462	FBgn0004907	+
2R	10306552	10306583	FBgn0033504	+
2R	10469513	10469544	FBgn0261862	-
2R	10481779	10481815	FBgn0033529	+
2R	10504994	10505026	FBgn0283521	-
2R	10536776	10536808	FBgn0283521	-
2R	10537186	10537217	FBgn0283521	-
2R	10600675	10600713	FBgn0263102	+
2R	10600675	10600715	FBgn0263102	+
2R	10612714	10612745	FBgn0263102	+
2R	10616894	10616925	FBgn0263102	+
2R	10839185	10839216	FBgn0050015	-
2R	11357957	11357992	FBgn0033624	-
2R	11361819	11361853	FBgn0024188	+
2R	11370324	11370367	FBgn0021795	-
2R	11591391	11591436	FBgn0033636	-
2R	11591419	11591451	FBgn0033636	-
2R	11591452	11591496	FBgn0033636	-
2R	11681584	11681616	FBgn0040491	+
2R	11831317	11831351	FBgn0033654	-
2R	11831319	11831351	FBgn0033654	-
2R	11860291	11860322	FBgn0013756	+
2R	11887576	11887613	FBgn0033663	-
2R	11887656	11887690	FBgn0033663	-
2R	11888656	11888688	FBgn0033663	-
2R	11893101	11893162	FBgn0284245	+
2R	11893101	11893162	FBgn0284245,FBgn0284245	+
2R	11895289	11895325	FBgn0284245	+
2R	11895400	11895509	FBgn0284245	+
2R	11895412	11895448	FBgn0284245	+
2R	11895464	11895512	FBgn0284245	+
2R	12161185	12161216	FBgn0033688	-
2R	12166714	12166746	FBgn0014184	-
2R	12177480	12177513	FBgn0010621	+
2R	12199409	12199499	FBgn0033699	-
2R	12199493	12199535	FBgn0033699	-
2R	12488237	12488268	FBgn0045063	-
2R	12549839	12549870	FBgn0011592	+
2R	12573502	12573533	FBgn0033755	+
2R	12575264	12575296	FBgn0022764	-
2R	12634184	12634215	FBgn0061359	-
2R	12634184	12634215	FBgn0061359,FBgn0061360	-
2R	12659937	12659968	FBgn0261673	-
2R	12759712	12759745	FBgn0086904	-
2R	12870241	12870272	FBgn0000181	+
2R	12871147	12871203	FBgn0000181	+
2R	12934423	12934455	FBgn0033784	-
2R	12951108	12951139	FBgn0265185	-
2R	12966128	12966160	FBgn0005624	-
2R	13237359	13237390	FBgn0033816	-
2R	13338038	13338069	FBgn0265104	-
2R	13489936	13489967	FBgn0033844	-
2R	13841660	13841695	FBgn0033875	+
2R	13864903	13864934	FBgn0013733	-
2R	13967868	13967952	FBgn0013770	+
2R	14162998	14163029	FBgn0033901	+
2R	14172842	14172874	FBgn0033906	+
2R	14172869	14172901	FBgn0033906	+
2R	14215366	14215400	FBgn0033912	-
2R	14215366	14215424	FBgn0033912	-
2R	14215391	14215426	FBgn0033912	-
2R	14215502	14215538	FBgn0033912	-
2R	14252644	14252675	FBgn0001220	-
2R	14268877	14268908	FBgn0261270	-
2R	14357947	14357980	FBgn0033926	-
2R	14577306	14577337	FBgn0265974	+
2R	14619537	14619571	FBgn0010638	+
2R	14749951	14749982	FBgn0041581	+
2R	14750238	14750269	FBgn0028689	-
2R	14772479	14772511	FBgn0015602	+
2R	15350413	15350444	FBgn0034013	+
2R	15569591	15569625	FBgn0013762	-
2R	15762607	15762639	FBgn0265991	-
2R	15869779	15869810	FBgn0264089	-
2R	15923061	15923093	FBgn0034049	-
2R	16099351	16099385	FBgn0034073	-
2R	16107092	16107129	FBgn0014020	+
2R	16107167	16107198	FBgn0014020	+
2R	16169023	16169055	FBgn0034083	+
2R	16570221	16570255	FBgn0034138	-
2R	16586652	16586717	FBgn0003274	+
2R	16693044	16693077	FBgn0013763	+
2R	16792392	16792425	FBgn0034158	+
2R	16857479	16857511	FBgn0026533	+
2R	16869077	16869115	FBgn0028737	+
2R	17088555	17088586	FBgn0010591	-
2R	17414154	17414186	FBgn0286070	-
2R	17424441	17424472	FBgn0022029	+
2R	17538955	17538988	FBgn0034237	+
2R	17546454	17546486	FBgn0010409	-
2R	17603900	17603933	FBgn0029006	+
2R	17734554	17734585	FBgn0034269	-
2R	17780327	17780359	FBgn0250851	-
2R	17780327	17780359	FBgn0250851,FBgn0028741	-
2R	18142780	18142814	FBgn0265297	+
2R	18147012	18147112	FBgn0265297	+
2R	18147046	18147111	FBgn0265297	+
2R	18175457	18175488	FBgn0034313	-
2R	18278607	18278639	FBgn0285917	-
2R	18420606	18420638	FBgn0027835	+
2R	18420661	18420695	FBgn0027835	+
2R	18426172	18426205	FBgn0034345	+
2R	18632408	18632440	FBgn0050122	-
2R	18634839	18634872	FBgn0050122	-
2R	18642201	18642232	FBgn0034371	-
2R	18774792	18774824	FBgn0034389	+
2R	18833379	18833411	FBgn0034398	-
2R	18833534	18833568	FBgn0034398	-
2R	18836784	18836817	FBgn0034399	+
2R	19443445	19443495	FBgn0013325	+
2R	19443457	19443490	FBgn0013325	+
2R	19447327	19447361	FBgn0284243	-
2R	19447350	19447394	FBgn0284243	-
2R	19485567	19485599	FBgn0260934	+
2R	19673415	19673446	FBgn0028372	+
2R	20261761	20261793	FBgn0005655	-
2R	20264789	20264823	FBgn0010411	+
2R	20264793	20264827	FBgn0010411	+
2R	20308348	20308379	FBgn0034500	-
2R	20606518	20606550	FBgn0267791	+
2R	21138526	21138558	FBgn0034590	-
2R	21209791	21209823	FBgn0265191	+
2R	21325242	21325274	FBgn0020306	+
2R	21487630	21487661	FBgn0010470	-
2R	21514711	21514743	FBgn0043070	+
2R	21622391	21622422	FBgn0016641	-
2R	21723929	21723960	FBgn0034657	+
2R	22069658	22069689	FBgn0265192	+
2R	22105755	22105786	FBgn0034694	+
2R	22124218	22124249	FBgn0002715	+
2R	22197270	22197353	FBgn0034709	-
2R	22197270	22197353	FBgn0034709,FBgn0034709	-
2R	22197274	22197386	FBgn0034709	-
2R	22197274	22197386	FBgn0034709,FBgn0034709	-
2R	22197285	22197319	FBgn0034709	-
2R	22197319	22197353	FBgn0034709	-
2R	22197352	22197385	FBgn0034709	-
2R	22197353	22197386	FBgn0034709	-
2R	22525813	22525846	FBgn0003175	-
2R	22600189	22600221	FBgn0034741	+
2R	22607925	22607971	FBgn0034743	+
2R	22609352	22609384	FBgn0034744	+
2R	22802079	22802116	FBgn0011211	+
2R	22881416	22881447	FBgn0034791	-
2R	22890036	22890068	FBgn0034795	+
2R	23070262	23070293	FBgn0021979	+
2R	23675925	23675957	FBgn0266377	+
2R	23863142	23863176	FBgn0025335	-
2R	23925011	23925042	FBgn0261794	+
2R	24044298	24044330	FBgn0034964	+
2R	24059341	24059397	FBgn0285952	+
2R	24059433	24059465	FBgn0285952	+
2R	24059435	24059468	FBgn0285952	+
2R	24061315	24061349	FBgn0034968	+
2R	24061868	24061905	FBgn0023170	-
2R	24174859	24174893	FBgn0259937	+
2R	24599263	24599294	FBgn0035032	-
2R	24903419	24903514	FBgn0066084	-
2R	24903429	24903463	FBgn0066084	-
2R	24968461	24968508	FBgn0285950	-
2R	25030003	25030037	FBgn0004055	+
3L	198001	198032	FBgn0035106	-
3L	249971	250002	FBgn0052476	+
3L	259301	259334	FBgn0035121	-
3L	260060	260095	FBgn0035121	-
3L	260061	260094	FBgn0035121	-
3L	576696	576727	FBgn0035142	+
3L	577815	577849	FBgn0035142	+
3L	651191	651223	FBgn0035147	+
3L	685519	685550	FBgn0035153	-
3L	827343	827377	FBgn0035162	-
3L	880646	880678	FBgn0035173	-
3L	890363	890399	FBgn0052479	+
3L	890363	890399	FBgn0052479,FBgn0052479	+
3L	890366	890399	FBgn0052479	+
3L	997295	997330	FBgn0024277	-
3L	997347	997378	FBgn0024277	-
3L	1300895	1300927	FBgn0010333	-
3L	1339311	1339344	FBgn0010786	+
3L	1498907	1498940	FBgn0028577	-
3L	1498909	1498941	FBgn0028577	-
3L	1622548	1622579	FBgn0035244	+
3L	1654901	1654933	FBgn0035253	-
3L	1667255	1667289	FBgn0026372	-
3L	1667255	1667294	FBgn0026372	-
3L	1667273	1667306	FBgn0026372	-
3L	2445088	2445120	FBgn0266696	+
3L	2588315	2588347	FBgn0261602	+
3L	2588807	2588853	FBgn0261602	+
3L	2641817	2641849	FBgn0250911	+
3L	2641817	2641849	FBgn0250911,FBgn0035357	+
3L	2768498	2768532	FBgn0035371	-
3L	2866601	2866632	FBgn0263392	-
3L	3044055	3044086	FBgn0040308	+
3L	3121958	3121990	FBgn0026189	-
3L	3121959	3121990	FBgn0026189	-
3L	3155439	3155471	FBgn0263108	+
3L	3196895	3196929	FBgn0001233	+
3L	3196931	3197009	FBgn0001233	+
3L	3196964	3196999	FBgn0001233	+
3L	3221140	3221220	FBgn0035422	-
3L	3221158	3221192	FBgn0035422	-
3L	3221160	3221193	FBgn0035422	-
3L	3221785	3221835	FBgn0035422	-
3L	3224479	3224513	FBgn0035423	+
3L	3224552	3224584	FBgn0035423	+
3L	3224587	3224636	FBgn0035423	+
3L	3333575	3333606	FBgn0035440	-
3L	3365116	3365147	FBgn0004167	+
3L	3401164	3401218	FBgn0014388	-
3L	3401164	3401219	FBgn0014388	-
3L	3401217	3401283	FBgn0014388	-
3L	3401219	3401280	FBgn0014388	-
3L	3401281	3401334	FBgn0014388	-
3L	3401532	3401563	FBgn0014388	-
3L	3401829	3401864	FBgn0014388	-
3L	3402148	3402183	FBgn0014388	-
3L	3402189	3402222	FBgn0014388	-
3L	3402209	3402241	FBgn0014388	-
3L	3402298	3402330	FBgn0014388	-
3L	3402606	3402641	FBgn0014388	-
3L	3416822	3416856	FBgn0014388	-
3L	3428678	3428724	FBgn0026259	-
3L	3428689	3428723	FBgn0026259	-
3L	3457747	3457778	FBgn0026259	-
3L	3593804	3593836	FBgn0005640	+
3L	3593812	3593860	FBgn0005640	+
3L	3593828	3593869	FBgn0005640	+
3L	3813798	3813829	FBgn0035464	+
3L	3816647	3816679	FBgn0004888	+
3L	3818071	3818103	FBgn0004888	+
3L	4114312	4114360	FBgn0035499	-
3L	4123146	4123177	FBgn0264693	-
3L	4553351	4553406	FBgn0035558	+
3L	4553412	4553444	FBgn0035558	+
3L	4626054	4626086	FBgn0262733	-
3L	5135615	5135646	FBgn0035593	+
3L	5150901	5150932	FBgn0263831	-
3L	5157583	5157614	FBgn0052423	-
3L	5163024	5163056	FBgn0052423	-
3L	5184012	5184043	FBgn0052423	-
3L	5497570	5497603	FBgn0035608	-
3L	5566950	5566982	FBgn0015766	-
3L	5567163	5567196	FBgn0015766	-
3L	5718988	5719019	FBgn0284236	+
3L	5718988	5719019	FBgn0284236,FBgn0085447	+
3L	5762003	5762037	FBgn0035630	-
3L	5763489	5763525	FBgn0035630	-
3L	5763492	5763524	FBgn0035630	-
3L	6169549	6169587	FBgn0035688	-
3L	6186112	6186143	FBgn0022935	-
3L	6203881	6203917	FBgn0002526	-
3L	6550031	6550063	FBgn0020251	+
3L	7240226	7240259	FBgn0035753	-
3L	7721323	7721354	FBgn0052373	+
3L	7721359	7721391	FBgn0035811	+
3L	7721359	7721391	FBgn0035811,FBgn0052373	+
3L	7815156	7815187	FBgn0016694	-
3L	8282542	8282573	FBgn0027569	-
3L	8356501	8356535	FBgn0001248	-
3L	8432351	8432383	FBgn0263352	-
3L	8440336	8440368	FBgn0263352	-
3L	8537926	8537961	FBgn0035909	+
3L	8562228	8562260	FBgn0260442	+
3L	8574286	8574319	FBgn0260442	+
3L	8720319	8720351	FBgn0052022	-
3L	9348249	9348280	FBgn0035976	+
3L	9391361	9391392	FBgn0035983	-
3L	9399629	9399683	FBgn0015218	-
3L	9455197	9455228	FBgn0035997	-
3L	9459368	9459399	FBgn0036000	-
3L	9486467	9486499	FBgn0036004	+
3L	9509926	9509960	FBgn0010408	-
3L	9509929	9509965	FBgn0010408	-
3L	9623865	9623899	FBgn0267348	+
3L	9623912	9623945	FBgn0267348	+
3L	10593122	10593153	FBgn0052062	+
3L	10692482	10692519	FBgn0036099	+
3L	11073329	11073360	FBgn0010741	-
3L	11198569	11198600	FBgn0036147	-
3L	11213860	11213891	FBgn0064766	+
3L	11229541	11229572	FBgn0261553	+
3L	11528810	11528841	FBgn0259481	-
3L	11824147	11824183	FBgn0036213	+
3L	12525140	12525171	FBgn0004926	-
3L	12804519	12804550	FBgn0260945	-
3L	13020068	13020099	FBgn0036337	-
3L	13043827	13043859	FBgn0011284	+
3L	13043834	13043875	FBgn0011284	+
3L	13278960	13278991	FBgn0023095	+
3L	13972645	13972676	FBgn0263232	+
3L	13972645	13972676	FBgn0263232,FBgn0036389	+
3L	13999428	13999460	FBgn0036397	-
3L	14020457	14020489	FBgn0052133	-
3L	14036564	14036595	FBgn0036403	+
3L	14070659	14070691	FBgn0267795	+
3L	14070767	14070800	FBgn0267795	+
3L	14540297	14540333	FBgn0026409	+
3L	14745181	14745212	FBgn0259175	+
3L	14776065	14776096	FBgn0036448	-
3L	14991387	14991419	FBgn0002778	+
3L	15001260	15001293	FBgn0023174	+
3L	15134595	15134627	FBgn0036483	-
3L	15134595	15134627	FBgn0036483	-
3L	15305252	15305283	FBgn0036493	+
3L	15557469	15557500	FBgn0087035	+
3L	15560903	15560935	FBgn0087035	+
3L	15565129	15565160	FBgn0036510	+
3L	15624038	15624069	FBgn0036522	+
3L	15821158	15821189	FBgn0036534	-
3L	16081931	16081963	FBgn0005536	+
3L	16130865	16130903	FBgn0011016	+
3L	16134528	16134559	FBgn0036574	+
3L	16226178	16226209	FBgn0263605	-
3L	16231554	16231585	FBgn0036580	-
3L	16616296	16616327	FBgn0000017	-
3L	16819462	16819515	FBgn0021768	+
3L	17012915	17012947	FBgn0036685	-
3L	17426583	17426614	FBgn0053051	-
3L	17668577	17668608	FBgn0036746	-
3L	17952962	17952994	FBgn0000568	-
3L	18668237	18668270	FBgn0042134	-
3L	18796758	18796789	FBgn0001078	-
3L	18808480	18808512	FBgn0036814	-
3L	18828657	18828690	FBgn0036816	-
3L	18828718	18828751	FBgn0036816	-
3L	18830662	18830694	FBgn0036816	-
3L	18878288	18878326	FBgn0036821	-
3L	19004968	19004999	FBgn0002945	-
3L	19256026	19256058	FBgn0040075	+
3L	19549430	19549461	FBgn0262517	-
3L	19633004	19633035	FBgn0036896	-
3L	19932319	19932352	FBgn0036921	+
3L	19932824	19932862	FBgn0036921	+
3L	19932861	19932896	FBgn0036921	+
3L	20812855	20812886	FBgn0037027	+
3L	20994134	20994168	FBgn0003415	-
3L	21512498	21512529	FBgn0037092	+
3L	21531118	21531150	FBgn0029152	-
3L	21543914	21543945	FBgn0037098	-
3L	21630627	21630658	FBgn0037109	-
3L	21825375	21825407	FBgn0037135	+
3L	21827767	21827798	FBgn0037135	+
3L	21938686	21938717	FBgn0037141	-
3L	22077387	22077421	FBgn0000100	+
3L	22077425	22077458	FBgn0000100	+
3L	22293105	22293142	FBgn0004449	-
3L	22787483	22787514	FBgn0052451	+
3L	22914180	22914212	FBgn0037206	+
3L	22951192	22951223	FBgn0037207	+
3L	23093691	23093734	FBgn0024733	-
3L	23147719	23147750	FBgn0052350	-
3L	23716588	23716619	FBgn0039977	+
3L	25121219	25121251	FBgn0260008	+
3L	25516292	25516323	FBgn0267429	-
3L	27268394	27268430	FBgn0028697	+
3R	2087715	2087748	FBgn0267431	+
3R	4268207	4268239	FBgn0037228	+
3R	4268221	4268257	FBgn0037228	+
3R	4309698	4309732	FBgn0037231	-
3R	4405664	4405695	FBgn0263594	+
3R	4407065	4407115	FBgn0263594	+
3R	4407111	4407153	FBgn0263594	+
3R	4465442	4465473	FBgn0051523	-
3R	4713155	4713188	FBgn0037270	-
3R	4746284	4746316	FBgn0026620	-
3R	5128779	5128810	FBgn0037293	+
3R	5268316	5268348	FBgn0264785	+
3R	5293884	5293915	FBgn0013576	-
3R	5372343	5372374	FBgn0003275	+
3R	5559957	5559991	FBgn0037339	-
3R	5594573	5594607	FBgn0283535	+
3R	5605826	5605857	FBgn0261004	-
3R	5625869	5625904	FBgn0037351	+
3R	5652578	5652610	FBgn0262125	+
3R	5662322	5662354	FBgn0046222	+
3R	5755019	5755050	FBgn0266672	-
3R	5799454	5799486	FBgn0037379	+
3R	6000505	6000536	FBgn0003261	-
3R	6004689	6004720	FBgn0003261	-
3R	6206423	6206454	FBgn0037409	+
3R	6447911	6447944	FBgn0264495	+
3R	6765009	6765062	FBgn0000071	+
3R	6765059	6765093	FBgn0000071	+
3R	7077692	7077723	FBgn0037468	+
3R	7088777	7088822	FBgn0003884	+
3R	7494174	7494205	FBgn0015577	-
3R	7860948	7860979	FBgn0037525	-
3R	7909646	7909677	FBgn0004901	-
3R	7921998	7922029	FBgn0002542	+
3R	7921998	7922030	FBgn0002542	+
3R	8129062	8129096	FBgn0037551	+
3R	8359870	8359902	FBgn0020249	+
3R	8664542	8664573	FBgn0037606	+
3R	8673642	8673673	FBgn0037607	+
3R	8827482	8827514	FBgn0262614	-
3R	8942525	8942562	FBgn0037643	+
3R	9068882	9068931	FBgn0003165	-
3R	9071363	9071394	FBgn0003165	-
3R	9628968	9629027	FBgn0005585	-
3R	10325609	10325640	FBgn0266717	-
3R	10760085	10760116	FBgn0051390	-
3R	11211213	11211244	FBgn0037874	+
3R	11215422	11215457	FBgn0086472	-
3R	11215442	11215499	FBgn0086472	-
3R	11215466	11215501	FBgn0086472	-
3R	11215496	11215545	FBgn0086472	-
3R	11408892	11408924	FBgn0264694	-
3R	11560055	11560087	FBgn0037913	-
3R	11560055	11560087	FBgn0037913,FBgn0037912	-
3R	11564123	11564156	FBgn0037913	-
3R	11564123	11564156	FBgn0037913,FBgn0037912	-
3R	11564167	11564198	FBgn0037913	-
3R	11564167	11564198	FBgn0037913,FBgn0037912	-
3R	11575907	11575938	FBgn0263316	+
3R	11651898	11651929	FBgn0037926	+
3R	11674846	11674894	FBgn0037930	+
3R	11820035	11820068	FBgn0019624	+
3R	12396653	12396684	FBgn0038034	-
3R	12433767	12433799	FBgn0029512	-
3R	12447391	12447423	FBgn0086687	+
3R	12447450	12447487	FBgn0086687	+
3R	12447514	12447557	FBgn0086687	+
3R	12704758	12704792	FBgn0016693	+
3R	12990965	12990996	FBgn0051342	+
3R	12997003	12997034	FBgn0038107	-
3R	12997003	12997034	FBgn0038107,FBgn0265083	-
3R	13268120	13268152	FBgn0003598	+
3R	13268263	13268295	FBgn0003598	+
3R	13637758	13637790	FBgn0263396	-
3R	13653962	13653995	FBgn0015778	+
3R	13658947	13658979	FBgn0004237	-
3R	14008594	14008626	FBgn0264493	-
3R	14081898	14081930	FBgn0038197	+
3R	14302209	14302241	FBgn0285913	+
3R	14620891	14620922	FBgn0003169	-
3R	14626529	14626568	FBgn0013981	+
3R	14642830	14642864	FBgn0086686	-
3R	14793150	14793182	FBgn0263929	+
3R	15129929	15129961	FBgn0261859	-
3R	15227026	15227057	FBgn0263979	+
3R	15246519	15246592	FBgn0266599	+
3R	15246526	15246561	FBgn0266599	+
3R	15801993	15802025	FBgn0262527	+
3R	15838833	15838864	FBgn0038371	-
3R	15999674	15999705	FBgn0003507	+
3R	16004026	16004060	FBgn0003507	+
3R	16340184	16340218	FBgn0283477	-
3R	16999344	16999375	FBgn0038463	+
3R	17084728	17084761	FBgn0038476	+
3R	17091715	17091746	FBgn0014141	-
3R	17091785	17091818	FBgn0014141	-
3R	18177046	18177077	FBgn0042693	+
3R	18249151	18249185	FBgn0020238	+
3R	18299986	18300018	FBgn0024432	+
3R	18421448	18421479	FBgn0004652	-
3R	18606569	18606603	FBgn0038629	-
3R	18651876	18651907	FBgn0051224	-
3R	19643281	19643312	FBgn0283536	-
3R	19879874	19879906	FBgn0014006	+
3R	19913683	19913715	FBgn0038747	+
3R	20296025	20296056	FBgn0262582	+
3R	20301930	20301962	FBgn0262582	+
3R	20302315	20302348	FBgn0262582	+
3R	20586144	20586176	FBgn0014029	-
3R	20621138	20621169	FBgn0038815	+
3R	20823243	20823277	FBgn0019936	+
3R	20823246	20823284	FBgn0019936	+
3R	20851114	20851146	FBgn0038834	+
3R	20851361	20851394	FBgn0038834	+
3R	20912788	20912822	FBgn0051191	-
3R	21069691	21069725	FBgn0000083	+
3R	21091046	21091077	FBgn0265067	+
3R	21159198	21159229	FBgn0264357	+
3R	22036373	22036405	FBgn0266581	+
3R	22036373	22036408	FBgn0266581	+
3R	22059041	22059074	FBgn0264491	+
3R	22059041	22059075	FBgn0264491	+
3R	22360658	22360691	FBgn0038947	+
3R	22489121	22489154	FBgn0003676	-
3R	22620365	22620396	FBgn0020278	-
3R	23205820	23205851	FBgn0262975	-
3R	23359847	23359879	FBgn0002622	+
3R	23995305	23995336	FBgn0015795	+
3R	24188135	24188166	FBgn0039163	-
3R	24237204	24237236	FBgn0043884	+
3R	24237204	24237238	FBgn0043884	+
3R	24237204	24237240	FBgn0043884	+
3R	24237204	24237240	FBgn0043884,FBgn0043884	+
3R	24627305	24627337	FBgn0046685	-
3R	24760775	24760806	FBgn0015591	-
3R	24760785	24760816	FBgn0015591	-
3R	24915849	24915880	FBgn0265189	-
3R	25052771	25052802	FBgn0039266	+
3R	25126233	25126264	FBgn0260229	-
3R	25126233	25126264	FBgn0260229,FBgn0039280	-
3R	25258584	25258619	FBgn0039302	+
3R	25659211	25659242	FBgn0027508	-
3R	25684018	25684062	FBgn0039359	-
3R	26841620	26841651	FBgn0262473	+
3R	26866310	26866341	FBgn0027889	-
3R	26869103	26869135	FBgn0001197	+
3R	27065001	27065033	FBgn0003495	-
3R	27065015	27065064	FBgn0003495	-
3R	27924839	27924871	FBgn0003279	+
3R	28522228	28522259	FBgn0003137	-
3R	28540203	28540235	FBgn0003137	-
3R	28832889	28832920	FBgn0015589	-
3R	29036976	29037007	FBgn0027873	+
3R	29143131	29143162	FBgn0039640	+
3R	29221623	29221654	FBgn0029176	+
3R	29221994	29222028	FBgn0029176	+
3R	29222025	29222075	FBgn0029176	+
3R	29315278	29315311	FBgn0015622	-
3R	29598895	29598926	FBgn0086361	+
3R	29599147	29599181	FBgn0086361	+
3R	29619122	29619153	FBgn0039674	+
3R	29747729	29747763	FBgn0020235	-
3R	29862656	29862690	FBgn0039713	+
3R	29863249	29863303	FBgn0039713	+
3R	29863266	29863299	FBgn0039713	+
3R	29863471	29863506	FBgn0039713	+
3R	29863471	29863506	FBgn0039713	+
3R	29863508	29863546	FBgn0039713	+
3R	30003719	30003753	FBgn0039735	-
3R	30010263	30010298	FBgn0016685	+
3R	30010278	30010310	FBgn0016685	+
3R	30010298	30010329	FBgn0016685	+
3R	30035218	30035249	FBgn0026597	+
3R	30045242	30045277	FBgn0002626	-
3R	30206549	30206585	FBgn0039757	-
3R	30206552	30206587	FBgn0039757	-
3R	30330832	30330863	FBgn0010113	+
3R	30330901	30330932	FBgn0010113	+
3R	30385583	30385640	FBgn0015222	-
3R	30476179	30476210	FBgn0039776	+
3R	30485707	30485739	FBgn0039776	+
3R	30883490	30883581	FBgn0000416	-
3R	30883507	30883544	FBgn0000416	-
3R	31588043	31588076	FBgn0003268	+
3R	31594863	31594913	FBgn0039857	-
3R	31594864	31594898	FBgn0039857	-
3R	31734941	31734972	FBgn0003870	+
3R	31745191	31745258	FBgn0000150	-
3R	31789980	31790011	FBgn0005632	+
4	40950	40982	FBgn0025740	-
4	66210	66245	FBgn0017545	-
4	537868	537901	FBgn0004607	+
4	881934	881966	FBgn0025726	-
4	1026809	1026840	FBgn0025741	-
4	1223381	1223412	FBgn0263112	+
mitochondrion_genome	2856	2895	FBgn0013674	+
mitochondrion_genome	2913	2969	FBgn0013674	+
mitochondrion_genome	3636	3672	FBgn0013675	+
mitochondrion_genome	3688	3740	FBgn0013675	+
mitochondrion_genome	4661	4698	FBgn0013672	+
mitochondrion_genome	5471	5518	FBgn0013676	+
mitochondrion_genome	5486	5522	FBgn0013676	+
mitochondrion_genome	12542	12575	FBgn0013679	-
X	288583	288614	FBgn0024989	+
X	513217	513251	FBgn0023535	+
X	610559	610590	FBgn0025633	-
X	1220336	1220367	FBgn0261444	-
X	1242850	1242881	FBgn0028550	-
X	1481804	1481853	FBgn0003517	-
X	1481807	1481851	FBgn0003517	-
X	1572874	1572905	FBgn0025390	-
X	1668104	1668135	FBgn0000482	+
X	1916228	1916259	FBgn0023510	+
X	1916228	1916259	FBgn0023510,FBgn0023509	+
X	2078381	2078414	FBgn0040394	-
X	2092995	2093037	FBgn0040395	+
X	2093035	2093067	FBgn0040395	+
X	2148440	2148471	FBgn0004654	+
X	2221840	2221871	FBgn0004397	-
X	2271193	2271227	FBgn0023529	-
X	2271285	2271316	FBgn0023529	-
X	2477859	2477891	FBgn0284408	-
X	2589181	2589212	FBgn0001404	+
X	2609256	2609290	FBgn0029629	-
X	2628554	2628585	FBgn0267350	+
X	3135853	3135885	FBgn0004647	+
X	3184691	3184722	FBgn0000479	+
X	3256668	3256699	FBgn0000479	+
X	3302847	3302878	FBgn0000479	+
X	3375819	3375850	FBgn0262656	+
X	3386488	3386519	FBgn0262656	+
X	3545809	3545841	FBgn0052791	-
X	3788823	3788855	FBgn0283657	+
X	3939909	3939940	FBgn0029686	+
X	4553311	4553342	FBgn0052773	-
X	4699261	4699293	FBgn0011760	+
X	4699372	4699419	FBgn0011760	+
X	4705046	4705079	FBgn0028325	+
X	4939325	4939356	FBgn0004368	+
X	5081825	5081858	FBgn0052767	-
X	5414163	5414194	FBgn0263987	-
X	5518697	5518730	FBgn0029771	+
X	5619156	5619191	FBgn0004687	-
X	5673433	5673496	FBgn0029785	+
X	5673495	5673530	FBgn0029785	+
X	5719741	5719775	FBgn0052758	-
X	5721523	5721554	FBgn0052758	-
X	5870942	5870973	FBgn0029818	-
X	5900845	5900880	FBgn0000042	+
X	5904347	5904381	FBgn0000042	+
X	5904370	5904433	FBgn0000042	+
X	5913094	5913129	FBgn0029823	-
X	5913141	5913176	FBgn0029823	-
X	5944959	5944991	FBgn0029825	+
X	6272857	6272888	FBgn0028982	+
X	6531021	6531056	FBgn0014026	-
X	6531062	6531098	FBgn0014026	-
X	6652341	6652372	FBgn0029881	+
X	6652978	6653016	FBgn0029881	+
X	6673750	6673781	FBgn0029887	-
X	6741663	6741696	FBgn0029897	-
X	6741752	6741799	FBgn0029897	-
X	6958102	6958133	FBgn0052732	-
X	7896731	7896763	FBgn0040087	+
X	7952809	7952840	FBgn0260970	+
X	8038851	8038885	FBgn0004656	-
X	8070161	8070208	FBgn0004657	+
X	8417261	8417296	FBgn0261793	+
X	8417261	8417296	FBgn0261793	+
X	8417263	8417296	FBgn0261793	+
X	8431036	8431068	FBgn0261793	+
X	9071394	9071427	FBgn0265413	-
X	9092661	9092694	FBgn0030086	+
X	9092756	9092787	FBgn0030086	+
X	9104402	9104433	FBgn0004856	-
X	9147382	9147413	FBgn0030091	+
X	9147820	9147851	FBgn0030091	+
X	9166517	9166559	FBgn0026206	+
X	9166525	9166560	FBgn0026206	+
X	9166569	9166604	FBgn0026206	+
X	9166614	9166647	FBgn0026206	+
X	9166684	9166717	FBgn0026206	+
X	9166714	9166749	FBgn0026206	+
X	9166744	9166824	FBgn0026206	+
X	9166840	9166880	FBgn0026206	+
X	9166884	9166916	FBgn0026206	+
X	9166912	9166952	FBgn0026206	+
X	9167166	9167200	FBgn0026206	+
X	9167404	9167454	FBgn0026206	+
X	9167423	9167457	FBgn0026206	+
X	9167511	9167601	FBgn0026206	+
X	9167536	9167569	FBgn0026206	+
X	9167567	9167602	FBgn0026206	+
X	9167634	9167667	FBgn0026206	+
X	9167667	9167701	FBgn0026206	+
X	9167693	9167751	FBgn0026206	+
X	9167712	9167749	FBgn0026206	+
X	9167747	9167781	FBgn0026206	+
X	9167768	9167803	FBgn0026206	+
X	9167780	9167812	FBgn0026206	+
X	9167812	9167846	FBgn0026206	+
X	9167857	9167907	FBgn0026206	+
X	9167874	9167910	FBgn0026206	+
X	9167909	9167944	FBgn0026206	+
X	9167911	9167945	FBgn0026206	+
X	9167948	9168006	FBgn0026206	+
X	9168030	9168066	FBgn0026206	+
X	9168063	9168096	FBgn0026206	+
X	9168112	9168146	FBgn0026206	+
X	9168147	9168193	FBgn0026206	+
X	9168160	9168197	FBgn0026206	+
X	9168211	9168267	FBgn0026206	+
X	9168213	9168246	FBgn0026206	+
X	9168310	9168346	FBgn0026206	+
X	9168342	9168380	FBgn0026206	+
X	9168500	9168553	FBgn0026206	+
X	9168509	9168549	FBgn0026206	+
X	9168581	9168613	FBgn0026206	+
X	9168583	9168614	FBgn0026206	+
X	9168634	9168666	FBgn0026206	+
X	9168849	9168881	FBgn0026206	+
X	9168879	9168913	FBgn0026206	+
X	9168915	9168953	FBgn0026206	+
X	9168984	9169017	FBgn0026206	+
X	9169011	9169060	FBgn0026206	+
X	9169056	9169090	FBgn0026206	+
X	9169081	9169115	FBgn0026206	+
X	9169121	9169153	FBgn0026206	+
X	9169165	9169196	FBgn0026206	+
X	9169200	9169233	FBgn0026206	+
X	9169488	9169522	FBgn0026206	+
X	9169490	9169522	FBgn0026206	+
X	9169524	9169557	FBgn0026206	+
X	9169693	9169751	FBgn0026206	+
X	9169867	9169902	FBgn0026206	+
X	9169878	9169913	FBgn0026206	+
X	9170058	9170117	FBgn0026206	+
X	9170118	9170149	FBgn0026206	+
X	9170160	9170194	FBgn0026206	+
X	9170296	9170327	FBgn0026206	+
X	9170327	9170364	FBgn0026206	+
X	9170404	9170437	FBgn0026206	+
X	9170404	9170440	FBgn0026206	+
X	9170452	9170486	FBgn0026206	+
X	9196860	9196891	FBgn0086450	-
X	9256798	9256830	FBgn0028292	+
X	9358544	9358575	FBgn0026149	+
X	9358555	9358587	FBgn0261260	-
X	9551148	9551190	FBgn0028327	-
X	9551204	9551243	FBgn0028327	-
X	9554982	9555013	FBgn0030136	+
X	9555082	9555117	FBgn0030136	+
X	9571573	9571607	FBgn0052699	-
X	9571615	9571647	FBgn0052699	-
X	9668548	9668579	FBgn0261617	-
X	10077957	10077988	FBgn0052685	-
X	10214327	10214361	FBgn0028342	+
X	10316260	10316292	FBgn0259170	-
X	10316260	10316292	FBgn0259170	-
X	10359054	10359085	FBgn0028331	-
X	10464125	10464157	FBgn0261710	-
X	10481894	10481925	FBgn0030208	+
X	10575479	10575511	FBgn0085443	-
X	10764931	10764976	FBgn0052672	-
X	10781014	10781046	FBgn0025111	-
X	10781014	10781046	FBgn0025111,FBgn0003360	-
X	11144926	11144961	FBgn0020255	-
X	11145334	11145365	FBgn0020255	-
X	11152424	11152456	FBgn0030274	+
X	11408253	11408284	FBgn0001624	+
X	11431700	11431731	FBgn0262740	-
X	11555342	11555373	FBgn0030309	-
X	11696398	11696429	FBgn0011754	+
X	11764151	11764182	FBgn0030332	-
X	11801729	11801763	FBgn0001218	-
X	11817528	11817559	FBgn0266019	+
X	11864713	11864744	FBgn0030344	-
X	12475694	12475725	FBgn0259143	+
X	12680350	12680384	FBgn0011837	+
X	12757791	12757825	FBgn0020513	-
X	12760904	12760935	FBgn0030420	-
X	12907689	12907721	FBgn0030433	+
X	13294613	13294644	FBgn0030467	-
X	13335717	13335750	FBgn0010198	-
X	13613251	13613282	FBgn0030502	-
X	13707690	13707721	FBgn0030512	-
X	13741055	13741088	FBgn0030519	+
X	13758573	13758605	FBgn0020909	+
X	13780078	13780110	FBgn0030521	-
X	13959390	13959422	FBgn0267033	-
X	14791610	14791641	FBgn0003301	-
X	15593142	15593173	FBgn0030662	-
X	15755441	15755472	FBgn0030685	-
X	15825590	15825621	FBgn0003345	+
X	15825763	15825794	FBgn0003345	+
X	15836854	15836886	FBgn0052582	+
X	15950002	15950034	FBgn0259110	-
X	15950002	15950037	FBgn0259110	-
X	15978145	15978177	FBgn0030716	-
X	16277513	16277546	FBgn0004066	+
X	16318094	16318127	FBgn0004432	-
X	16367394	16367425	FBgn0004227	+
X	16388158	16388189	FBgn0030745	+
X	16455469	16455503	FBgn0285944	-
X	16610376	16610414	FBgn0061200	+
X	16638845	16638879	FBgn0010412	+
X	16693991	16694023	FBgn0259923	-
X	16826421	16826452	FBgn0030796	+
X	17143635	17143669	FBgn0002590	-
X	17285737	17285768	FBgn0024238	-
X	17457073	17457104	FBgn0263706	-
X	17633359	17633390	FBgn0030853	+
X	17706444	17706475	FBgn0026192	+
X	17728057	17728088	FBgn0261570	+
X	17820843	17820874	FBgn0030869	-
X	18088349	18088381	FBgn0030891	+
X	18090242	18090273	FBgn0030892	-
X	18132487	18132518	FBgn0017418	-
X	18378092	18378124	FBgn0004957	-
X	18520284	18520325	FBgn0265598	+
X	18624778	18624809	FBgn0030941	-
X	18628639	18628671	FBgn0030941	-
X	18788680	18788711	FBgn0283473	+
X	18877527	18877560	FBgn0085430	+
X	18935068	18935104	FBgn0264090	+
X	19270234	19270265	FBgn0040068	+
X	19598920	19598954	FBgn0285947	+
X	19598997	19599030	FBgn0285947	+
X	19687578	19687609	FBgn0031057	+
X	19906683	19906715	FBgn0052529	+
X	21043979	21044010	FBgn0025814	+
X	21050008	21050040	FBgn0031149	-
X	21051707	21051738	FBgn0031149	-
X	21304458	21304490	FBgn0031170	-
X	21320598	21320632	FBgn0029067	-
X	21363820	21363851	FBgn0024251	+
X	21363820	21363851	FBgn0024251,FBgn0024182	+

## Sheet: NHL domain
Chromosome	Start coordinate in chromosome	End coordinate in chromosome	Gene number	Strand
2L	10276	10308	FBgn0002121	-
2L	114157	114189	FBgn0005278	+
2L	118184	118216	FBgn0031220	-
2L	297120	297154	FBgn0024352	+
2L	419944	419981	FBgn0002593	+
2L	419944	419986	FBgn0002593	+
2L	420008	420044	FBgn0002593	+
2L	420008	420045	FBgn0002593	+
2L	420634	420682	FBgn0002593	+
2L	420636	420670	FBgn0002593	+
2L	420636	420675	FBgn0002593	+
2L	813324	813358	FBgn0086130	+
2L	1151721	1151752	FBgn0261458	-
2L	1707151	1707184	FBgn0031356	-
2L	1725077	1725108	FBgn0000579	-
2L	2856100	2856135	FBgn0015521	+
2L	2856100	2856136	FBgn0015521	+
2L	2856472	2856503	FBgn0015521	+
2L	2856643	2856682	FBgn0015521	+
2L	3035520	3035552	FBgn0031497	-
2L	3035603	3035638	FBgn0031497	-
2L	3046743	3046779	FBgn0042627	+
2L	3046743	3046813	FBgn0042627	+
2L	3046743	3046813	FBgn0042627,FBgn0042627	+
2L	3046802	3046863	FBgn0042627	+
2L	3046802	3046863	FBgn0042627,FBgn0042627	+
2L	3046806	3046863	FBgn0042627	+
2L	3046806	3046863	FBgn0042627,FBgn0042627	+
2L	3046809	3046863	FBgn0042627	+
2L	3046809	3046863	FBgn0042627,FBgn0042627	+
2L	3048752	3048784	FBgn0042627	+
2L	3068107	3068140	FBgn0283427	+
2L	3068124	3068155	FBgn0283427	+
2L	4457192	4457225	FBgn0285948	-
2L	4457193	4457224	FBgn0285948	-
2L	4457226	4457263	FBgn0285948	-
2L	4457233	4457264	FBgn0285948	-
2L	4457251	4457289	FBgn0285948	-
2L	4457257	4457289	FBgn0285948	-
2L	5012148	5012185	FBgn0016075	-
2L	5012154	5012185	FBgn0016075	-
2L	5036980	5037070	FBgn0000299	+
2L	5051268	5051302	FBgn0022023	-
2L	5071769	5071802	FBgn0261608	+
2L	5071800	5071887	FBgn0261608	+
2L	5202389	5202423	FBgn0261836	+
2L	5205519	5205550	FBgn0261836	+
2L	5206919	5206951	FBgn0261836	+
2L	5316198	5316229	FBgn0031698	-
2L	5546581	5546615	FBgn0002525	+
2L	5973209	5973253	FBgn0000308	-
2L	5973251	5973284	FBgn0000308	-
2L	5984751	5984783	FBgn0001942	+
2L	5985490	5985525	FBgn0001942	+
2L	5985695	5985730	FBgn0001942	+
2L	6123755	6123786	FBgn0266521	+
2L	6477197	6477232	FBgn0086357	-
2L	6926575	6926606	FBgn0004838	+
2L	6927751	6927783	FBgn0004838	+
2L	7084612	7084644	FBgn0031888	-
2L	7445246	7445280	FBgn0031914	+
2L	7711488	7711522	FBgn0267326	+
2L	7820707	7820741	FBgn0261800	+
2L	7820709	7820740	FBgn0261800	+
2L	7825648	7825699	FBgn0020618	-
2L	7825706	7825742	FBgn0020618	-
2L	7827215	7827249	FBgn0020618	-
2L	8030070	8030102	FBgn0031977	+
2L	8041928	8041988	FBgn0031980	-
2L	8041956	8041989	FBgn0031980	-
2L	8200489	8200521	FBgn0031998	-
2L	8221150	8221184	FBgn0032006	-
2L	8259778	8259810	FBgn0003502	-
2L	8261567	8261599	FBgn0003502	-
2L	8306705	8306736	FBgn0032015	-
2L	8363712	8363757	FBgn0010265	-
2L	8380502	8380533	FBgn0027094	-
2L	8430918	8430951	FBgn0027932	+
2L	8482295	8482326	FBgn0262029	+
2L	8485809	8485899	FBgn0262029	+
2L	8485809	8485899	FBgn0262029,FBgn0262029	+
2L	8485812	8485843	FBgn0262029	+
2L	8485854	8485897	FBgn0262029	+
2L	8485854	8485897	FBgn0262029,FBgn0262029	+
2L	8829648	8829680	FBgn0029123	+
2L	9463216	9463247	FBgn0002973	+
2L	9548289	9548320	FBgn0032129	-
2L	9706631	9706662	FBgn0011207	+
2L	9917280	9917311	FBgn0025700	-
2L	9964178	9964209	FBgn0015664	-
2L	9968426	9968460	FBgn0011272	+
2L	10008580	10008612	FBgn0043456	+
2L	10008581	10008614	FBgn0043456	+
2L	10202045	10202086	FBgn0005593	+
2L	10202053	10202088	FBgn0005593	+
2L	10202087	10202121	FBgn0005593	+
2L	10226180	10226211	FBgn0032196	-
2L	10281964	10282001	FBgn0032208	-
2L	10304097	10304128	FBgn0032213	-
2L	10358188	10358222	FBgn0027568	-
2L	10358278	10358309	FBgn0027568	-
2L	10374202	10374236	FBgn0053303	-
2L	10409752	10409785	FBgn0003942	+
2L	10409752	10409786	FBgn0003942	+
2L	10410370	10410421	FBgn0003942	+
2L	10964931	10964970	FBgn0053129	-
2L	10989141	10989172	FBgn0026148	+
2L	11002844	11002902	FBgn0015756	-
2L	11011513	11011546	FBgn0250837	+
2L	11117939	11117970	FBgn0027582	-
2L	11508989	11509020	FBgn0032363	-
2L	11516979	11517013	FBgn0032363	-
2L	11523324	11523381	FBgn0028490	-
2L	11523419	11523450	FBgn0028490	-
2L	11615347	11615381	FBgn0015400	+
2L	11795211	11795246	FBgn0020309	-
2L	11795771	11795802	FBgn0020309	-
2L	12098531	12098562	FBgn0032409	+
2L	12426976	12427007	FBgn0032429	-
2L	12432847	12432878	FBgn0265298	-
2L	12435283	12435316	FBgn0020443	+
2L	12690404	12690439	FBgn0032444	-
2L	12704737	12704768	FBgn0032451	+
2L	12708612	12708647	FBgn0032453	+
2L	12993785	12993819	FBgn0032465	-
2L	13394144	13394178	FBgn0032518	-
2L	13394318	13394381	FBgn0032518	-
2L	13827953	13827986	FBgn0001961	-
2L	14618931	14618962	FBgn0003016	-
2L	14618931	14618962	FBgn0003016	-
2L	15727637	15727669	FBgn0010382	-
2L	16301673	16301704	FBgn0028895	+
2L	16354988	16355050	FBgn0025678	-
2L	16355062	16355099	FBgn0025678	-
2L	16452954	16452988	FBgn0020414	+
2L	16452979	16453028	FBgn0020414	+
2L	16722561	16722594	FBgn0284248	+
2L	16723374	16723406	FBgn0027779	-
2L	16901546	16901577	FBgn0032620	-
2L	17244932	17244963	FBgn0032629	-
2L	17244932	17244965	FBgn0032629	-
2L	17367541	17367574	FBgn0032633	-
2L	17409703	17409737	FBgn0032634	-
2L	17481602	17481634	FBgn0032642	+
2L	18442530	18442569	FBgn0261597	-
2L	18442837	18442871	FBgn0261597	-
2L	18443194	18443226	FBgn0261597	-
2L	18443194	18443231	FBgn0261597	-
2L	18599764	18599797	FBgn0032689	-
2L	18661729	18661760	FBgn0032694	+
2L	18700448	18700479	FBgn0032701	+
2L	18704576	18704608	FBgn0032704	-
2L	18977544	18977581	FBgn0032731	-
2L	19173384	19173421	FBgn0010300	+
2L	19502196	19502230	FBgn0040268	+
2L	19568027	19568059	FBgn0005672	-
2L	19810713	19810763	FBgn0263873	+
2L	19810715	19810748	FBgn0263873	+
2L	19810750	19810782	FBgn0263873	+
2L	20419780	20419813	FBgn0032859	+
2L	20419781	20419813	FBgn0032859	+
2L	20421808	20421842	FBgn0032859	+
2L	20730486	20730517	FBgn0032880	-
2L	20739166	20739197	FBgn0262743	+
2L	20754601	20754635	FBgn0032883	-
2L	20788568	20788599	FBgn0032884	+
2L	20925047	20925078	FBgn0032906	-
2L	21215115	21215153	FBgn0032935	-
2L	21215120	21215153	FBgn0032935	-
2L	21215138	21215186	FBgn0032935	-
2L	21215144	21215189	FBgn0032935	-
2L	21215144	21215189	FBgn0032935,FBgn0032935	-
2L	21215151	21215189	FBgn0032935	-
2L	21259472	21259503	FBgn0261239	+
2L	21319142	21319177	FBgn0284230	+
2L	21319461	21319494	FBgn0284230	+
2L	21319461	21319494	FBgn0284230,FBgn0000370	+
2L	21319463	21319514	FBgn0284230	+
2L	21537655	21537692	FBgn0053868	-
2L	21537657	21537693	FBgn0053868	-
2L	21577041	21577076	FBgn0032949	+
2L	21626907	21626938	FBgn0022893	-
2L	21626976	21627013	FBgn0022893	-
2L	21664416	21664448	FBgn0032957	-
2L	21678115	21678150	FBgn0000559	-
2L	21678197	21678231	FBgn0000559	-
2L	21680528	21680564	FBgn0000559	-
2L	22247158	22247191	FBgn0032987	-
2L	22247196	22247229	FBgn0032987	-
2L	22247366	22247404	FBgn0032987	-
2L	22534816	22534879	FBgn0064225	-
2L	22535644	22535679	FBgn0064225	-
2L	22580592	22580623	FBgn0040011	+
2L	23161962	23161993	FBgn0039958	-
2L	23162309	23162340	FBgn0039958	-
2L	23172285	23172316	FBgn0039958	-
2R	518268	518304	FBgn0267428	+
2R	2846531	2846563	FBgn0085638	-
2R	3938609	3938642	FBgn0262124	-
2R	4516032	4516089	FBgn0040007	-
2R	4516168	4516230	FBgn0040007	-
2R	4516171	4516204	FBgn0040007	-
2R	4516172	4516205	FBgn0040007	-
2R	4516418	4516453	FBgn0040007	-
2R	4516429	4516465	FBgn0040007	-
2R	5020994	5021026	FBgn0040849	+
2R	5240762	5240793	FBgn0053554	-
2R	5260032	5260063	FBgn0033015	+
2R	5656441	5656472	FBgn0033029	-
2R	5706985	5707022	FBgn0267978	-
2R	6011867	6011902	FBgn0264959	+
2R	6013924	6013981	FBgn0000043	-
2R	6013985	6014024	FBgn0000043	-
2R	6131898	6131929	FBgn0000546	-
2R	6142384	6142415	FBgn0000546	-
2R	6153516	6153547	FBgn0000546	-
2R	6162023	6162071	FBgn0000546	-
2R	6162023	6162071	FBgn0000546,FBgn0000546	-
2R	6162027	6162070	FBgn0000546	-
2R	6162034	6162070	FBgn0000546	-
2R	6162034	6162070	FBgn0000546,FBgn0000546	-
2R	6162696	6162728	FBgn0000546	-
2R	6162697	6162728	FBgn0000546	-
2R	6164890	6164925	FBgn0000546	-
2R	6164890	6164925	FBgn0000546,FBgn0000546	-
2R	6164891	6164923	FBgn0000546	-
2R	6164891	6164926	FBgn0000546	-
2R	6190140	6190174	FBgn0262867	-
2R	6190143	6190175	FBgn0262867	-
2R	6625250	6625299	FBgn0262736	-
2R	6625296	6625328	FBgn0262736	-
2R	6632349	6632380	FBgn0262736	-
2R	6692635	6692667	FBgn0033092	+
2R	6755991	6756024	FBgn0027066	+
2R	6947749	6947782	FBgn0066292	-
2R	6947749	6947782	FBgn0066292,FBgn0053558	-
2R	7009897	7009930	FBgn0029507	-
2R	7018295	7018327	FBgn0029506	+
2R	7319584	7319617	FBgn0033159	-
2R	7385357	7385388	FBgn0000352	-
2R	7508577	7508610	FBgn0261397	+
2R	7535839	7535870	FBgn0264294	+
2R	7823543	7823575	FBgn0029093	-
2R	8903030	8903062	FBgn0004921	+
2R	8903069	8903105	FBgn0004921	+
2R	8952088	8952133	FBgn0033357	+
2R	9121077	9121108	FBgn0003612	+
2R	9148432	9148463	FBgn0050344	+
2R	9162637	9162669	FBgn0033388	-
2R	9252915	9252946	FBgn0020621	-
2R	9425378	9425409	FBgn0033413	+
2R	9688346	9688380	FBgn0023143	-
2R	10049794	10049825	FBgn0040773	+
2R	10064362	10064393	FBgn0033479	-
2R	10249522	10249556	FBgn0003660	-
2R	10536809	10536842	FBgn0283521	-
2R	10536853	10536886	FBgn0283521	-
2R	10536853	10536886	FBgn0283521	-
2R	10536890	10536922	FBgn0283521	-
2R	10536986	10537018	FBgn0283521	-
2R	10537150	10537182	FBgn0283521	-
2R	10600674	10600707	FBgn0263102	+
2R	10877176	10877207	FBgn0263510	+
2R	10898272	10898305	FBgn0033571	-
2R	11370342	11370377	FBgn0021795	-
2R	11390262	11390293	FBgn0082585	-
2R	11591353	11591450	FBgn0033636	-
2R	11591353	11591450	FBgn0033636,FBgn0033636	-
2R	11591360	11591410	FBgn0033636	-
2R	11591360	11591410	FBgn0033636,FBgn0033636	-
2R	11591376	11591408	FBgn0033636	-
2R	11591466	11591498	FBgn0033636	-
2R	11831316	11831351	FBgn0033654	-
2R	11860043	11860075	FBgn0013756	+
2R	11887590	11887622	FBgn0033663	-
2R	11887614	11887651	FBgn0033663	-
2R	11893100	11893154	FBgn0284245	+
2R	11893100	11893162	FBgn0284245	+
2R	11893100	11893162	FBgn0284245,FBgn0284245	+
2R	11893101	11893132	FBgn0284245	+
2R	11895015	11895052	FBgn0284245	+
2R	11895042	11895079	FBgn0284245	+
2R	11895049	11895082	FBgn0284245	+
2R	11895264	11895298	FBgn0284245	+
2R	11895264	11895298	FBgn0284245	+
2R	11895264	11895300	FBgn0284245	+
2R	11895305	11895340	FBgn0284245	+
2R	11895305	11895340	FBgn0284245	+
2R	11895331	11895368	FBgn0284245	+
2R	11895367	11895403	FBgn0284245	+
2R	11895411	11895510	FBgn0284245	+
2R	12164956	12164987	FBgn0085261	-
2R	12167322	12167354	FBgn0014184	-
2R	12167735	12167767	FBgn0014184	-
2R	12176114	12176145	FBgn0010621	+
2R	12179499	12179533	FBgn0033691	-
2R	12199394	12199481	FBgn0033699	-
2R	12199701	12199736	FBgn0033699	-
2R	12617855	12617887	FBgn0266487	+
2R	12617855	12617887	FBgn0266487,FBgn0004435	+
2R	12640518	12640550	FBgn0011604	+
2R	12659604	12659648	FBgn0261673	-
2R	12871145	12871214	FBgn0000181	+
2R	12871303	12871336	FBgn0000181	+
2R	12950474	12950505	FBgn0265185	-
2R	13185118	13185151	FBgn0053182	-
2R	13185118	13185151	FBgn0053182,FBgn0028991	-
2R	13430275	13430306	FBgn0259221	-
2R	13430702	13430735	FBgn0259221	-
2R	13958552	13958583	FBgn0033886	-
2R	13967817	13967852	FBgn0013770	+
2R	13967896	13967950	FBgn0013770	+
2R	14163334	14163366	FBgn0033902	-
2R	14170553	14170587	FBgn0033906	+
2R	14215357	14215478	FBgn0033912	-
2R	14215365	14215398	FBgn0033912	-
2R	14215390	14215425	FBgn0033912	-
2R	14215391	14215424	FBgn0033912	-
2R	14215500	14215535	FBgn0033912	-
2R	14268823	14268858	FBgn0261270	-
2R	14357953	14357993	FBgn0033926	-
2R	14358014	14358048	FBgn0033926	-
2R	14365400	14365433	FBgn0033929	+
2R	14597522	14597553	FBgn0019938	-
2R	14603026	14603058	FBgn0003742	-
2R	14619553	14619589	FBgn0010638	+
2R	14619613	14619645	FBgn0010638	+
2R	14750238	14750273	FBgn0028689	-
2R	14866678	14866709	FBgn0264962	-
2R	15211775	15211806	FBgn0033998	-
2R	15324766	15324799	FBgn0013750	+
2R	15515535	15515566	FBgn0034025	+
2R	15542427	15542461	FBgn0022097	+
2R	15855013	15855044	FBgn0034046	+
2R	15932194	15932225	FBgn0015247	-
2R	15993655	15993687	FBgn0034059	+
2R	15993842	15993876	FBgn0020236	-
2R	16011352	16011384	FBgn0034062	-
2R	16107166	16107207	FBgn0014020	+
2R	16229796	16229829	FBgn0034094	+
2R	16570208	16570272	FBgn0034138	-
2R	16570221	16570256	FBgn0034138	-
2R	16570224	16570255	FBgn0034138	-
2R	16570319	16570352	FBgn0034138	-
2R	16586642	16586679	FBgn0003274	+
2R	16586676	16586717	FBgn0003274	+
2R	16693634	16693668	FBgn0013763	+
2R	16693684	16693718	FBgn0013763	+
2R	16869077	16869112	FBgn0028737	+
2R	17107266	17107297	FBgn0050456	+
2R	17138777	17138809	FBgn0034200	+
2R	17237855	17237886	FBgn0265487	+
2R	17344422	17344454	FBgn0265487	+
2R	17344422	17344454	FBgn0265487	+
2R	17344422	17344455	FBgn0265487	+
2R	17364010	17364041	FBgn0265487	+
2R	17465883	17465914	FBgn0034223	-
2R	17520557	17520588	FBgn0263197	-
2R	17546407	17546478	FBgn0010409	-
2R	17634106	17634137	FBgn0034253	-
2R	17734426	17734457	FBgn0085224	+
2R	18140765	18140799	FBgn0265297	+
2R	18142778	18142812	FBgn0265297	+
2R	18142809	18142868	FBgn0265297	+
2R	18142809	18142918	FBgn0265297	+
2R	18142809	18142868	FBgn0265297,FBgn0265297	+
2R	18142809	18142918	FBgn0265297,FBgn0265297	+
2R	18142812	18142868	FBgn0265297	+
2R	18142812	18142868	FBgn0265297,FBgn0265297	+
2R	18142865	18142917	FBgn0265297	+
2R	18142882	18142917	FBgn0265297	+
2R	18142976	18143012	FBgn0265297	+
2R	18142977	18143010	FBgn0265297	+
2R	18142989	18143024	FBgn0265297	+
2R	18143007	18143071	FBgn0265297	+
2R	18143007	18143071	FBgn0265297,FBgn0265297	+
2R	18147004	18147037	FBgn0265297	+
2R	18147046	18147111	FBgn0265297	+
2R	18406697	18406735	FBgn0063494	+
2R	18420674	18420709	FBgn0027835	+
2R	18658433	18658464	FBgn0259202	-
2R	18658433	18658464	FBgn0259202,FBgn0034372	-
2R	18821559	18821595	FBgn0010551	+
2R	18833378	18833411	FBgn0034398	-
2R	18833417	18833454	FBgn0034398	-
2R	18833451	18833486	FBgn0034398	-
2R	18833532	18833568	FBgn0034398	-
2R	18834540	18834571	FBgn0034398	-
2R	18971318	18971352	FBgn0041702	-
2R	19133639	19133670	FBgn0027535	+
2R	19133792	19133826	FBgn0034418	-
2R	19243678	19243710	FBgn0010434	+
2R	19290887	19290943	FBgn0013954	+
2R	19397190	19397222	FBgn0263391	-
2R	19398724	19398755	FBgn0263391	-
2R	19414416	19414449	FBgn0263391	-
2R	19423411	19423443	FBgn0263391	-
2R	19443442	19443495	FBgn0013325	+
2R	19443442	19443497	FBgn0013325	+
2R	20232832	20232863	FBgn0034484	+
2R	20242817	20242848	FBgn0034488	-
2R	20559172	20559203	FBgn0034521	-
2R	20827425	20827468	FBgn0011674	-
2R	20827425	20827468	FBgn0011674,FBgn0016984	-
2R	20996427	20996458	FBgn0034570	+
2R	21070465	21070498	FBgn0034583	-
2R	21129282	21129316	FBgn0002736	+
2R	21134669	21134700	FBgn0034590	-
2R	21145621	21145654	FBgn0021872	+
2R	21285599	21285642	FBgn0034611	+
2R	21294033	21294067	FBgn0016726	+
2R	21325241	21325294	FBgn0020306	+
2R	21325241	21325294	FBgn0020306,FBgn0020306	+
2R	21325242	21325276	FBgn0020306	+
2R	21325242	21325293	FBgn0020306	+
2R	21325242	21325293	FBgn0020306,FBgn0020306	+
2R	21326803	21326850	FBgn0020306	+
2R	21326803	21326850	FBgn0020306,FBgn0020306	+
2R	21326813	21326847	FBgn0020306	+
2R	21329676	21329708	FBgn0020306	+
2R	21329789	21329821	FBgn0020306	+
2R	21330283	21330316	FBgn0020306	+
2R	21330284	21330315	FBgn0020306	+
2R	21330984	21331019	FBgn0020306	+
2R	21331554	21331586	FBgn0020306	+
2R	21331595	21331654	FBgn0020306	+
2R	21331595	21331654	FBgn0020306,FBgn0020306	+
2R	21331607	21331642	FBgn0020306	+
2R	21333996	21334029	FBgn0020306	+
2R	21334154	21334188	FBgn0020306	+
2R	21334154	21334189	FBgn0020306	+
2R	21334157	21334188	FBgn0020306	+
2R	21334202	21334236	FBgn0020306	+
2R	21334202	21334237	FBgn0020306	+
2R	21334202	21334240	FBgn0020306	+
2R	21334202	21334240	FBgn0020306,FBgn0020306	+
2R	21443666	21443697	FBgn0010415	-
2R	21487581	21487636	FBgn0010470	-
2R	21614806	21614838	FBgn0042180	-
2R	21722392	21722423	FBgn0034657	+
2R	22197269	22197386	FBgn0034709	-
2R	22197269	22197386	FBgn0034709,FBgn0034709	-
2R	22197272	22197386	FBgn0034709	-
2R	22197272	22197386	FBgn0034709,FBgn0034709	-
2R	22197276	22197355	FBgn0034709	-
2R	22197276	22197355	FBgn0034709,FBgn0034709	-
2R	22197351	22197386	FBgn0034709	-
2R	22607093	22607127	FBgn0034743	+
2R	22607130	22607181	FBgn0034743	+
2R	22607130	22607181	FBgn0034743,FBgn0034743	+
2R	22607551	22607583	FBgn0034743	+
2R	22607551	22607583	FBgn0034743	+
2R	22607916	22607970	FBgn0034743	+
2R	22607917	22607953	FBgn0034743	+
2R	22640535	22640587	FBgn0261596	-
2R	22640597	22640631	FBgn0261596	-
2R	22640597	22640632	FBgn0261596	-
2R	22642044	22642077	FBgn0040091	-
2R	22667546	22667577	FBgn0050269	+
2R	22667546	22667577	FBgn0050269,FBgn0050273	+
2R	22802107	22802142	FBgn0011211	+
2R	22803597	22803631	FBgn0000405	-
2R	22855443	22855476	FBgn0010078	+
2R	22855481	22855521	FBgn0010078	+
2R	22855485	22855517	FBgn0010078	+
2R	22855599	22855633	FBgn0010078	+
2R	22855628	22855665	FBgn0010078	+
2R	22855632	22855669	FBgn0010078	+
2R	22934604	22934641	FBgn0034802	-
2R	23073869	23073904	FBgn0003062	-
2R	23356138	23356170	FBgn0050410	+
2R	23377945	23377977	FBgn0040660	-
2R	23680776	23680808	FBgn0266377	+
2R	23847175	23847206	FBgn0021895	-
2R	23905256	23905288	FBgn0015268	-
2R	24044460	24044498	FBgn0011726	-
2R	24057840	24057876	FBgn0285952	+
2R	24057843	24057878	FBgn0285952	+
2R	24059297	24059332	FBgn0285952	+
2R	24059313	24059346	FBgn0285952	+
2R	24059387	24059467	FBgn0285952	+
2R	24059431	24059467	FBgn0285952	+
2R	24061315	24061394	FBgn0034968	+
2R	24061353	24061389	FBgn0034968	+
2R	24061855	24061928	FBgn0023170	-
2R	24061858	24061895	FBgn0023170	-
2R	24061893	24061926	FBgn0023170	-
2R	24061894	24061926	FBgn0023170	-
2R	24061932	24061969	FBgn0023170	-
2R	24176311	24176345	FBgn0259937	+
2R	24374087	24374132	FBgn0004101	+
2R	24903427	24903500	FBgn0066084	-
2R	24903430	24903462	FBgn0066084	-
2R	24903904	24903940	FBgn0066084	-
2R	24968460	24968533	FBgn0285950	-
2R	25028393	25028425	FBgn0004055	+
3L	186254	186289	FBgn0027786	+
3L	259986	260065	FBgn0035121	-
3L	259986	260065	FBgn0035121,FBgn0035121	-
3L	259990	260099	FBgn0035121	-
3L	259990	260099	FBgn0035121,FBgn0035121	-
3L	259993	260025	FBgn0035121	-
3L	260031	260096	FBgn0035121	-
3L	260031	260096	FBgn0035121,FBgn0035121	-
3L	260057	260096	FBgn0035121	-
3L	260057	260096	FBgn0035121,FBgn0035121	-
3L	260146	260202	FBgn0035121	-
3L	391998	392030	FBgn0262139	-
3L	508232	508265	FBgn0001316	-
3L	576183	576215	FBgn0035142	+
3L	577812	577848	FBgn0035142	+
3L	651238	651274	FBgn0035147	+
3L	753321	753353	FBgn0000575	+
3L	827089	827129	FBgn0035162	-
3L	827089	827129	FBgn0035162,FBgn0035162	-
3L	827335	827391	FBgn0035162	-
3L	827343	827378	FBgn0035162	-
3L	827343	827378	FBgn0035162,FBgn0035162	-
3L	830442	830520	FBgn0035162	-
3L	830445	830479	FBgn0035162	-
3L	832557	832595	FBgn0035162	-
3L	832615	832649	FBgn0035162	-
3L	833078	833111	FBgn0035162	-
3L	836710	836741	FBgn0260756	+
3L	839667	839703	FBgn0035165	+
3L	890250	890281	FBgn0052479	+
3L	890305	890339	FBgn0052479	+
3L	890353	890464	FBgn0052479	+
3L	890353	890464	FBgn0052479,FBgn0052479	+
3L	890363	890401	FBgn0052479	+
3L	890366	890403	FBgn0052479	+
3L	890366	890403	FBgn0052479,FBgn0052479	+
3L	1300324	1300363	FBgn0025682	+
3L	1384826	1384858	FBgn0003295	+
3L	1667238	1667306	FBgn0026372	-
3L	1667242	1667274	FBgn0026372	-
3L	1668612	1668662	FBgn0026372	-
3L	1966746	1966779	FBgn0027547	-
3L	2569512	2569543	FBgn0010909	-
3L	2588797	2588855	FBgn0261602	+
3L	2595496	2595528	FBgn0016794	+
3L	2782030	2782061	FBgn0035374	+
3L	2789325	2789356	FBgn0263392	-
3L	3087750	3087781	FBgn0035397	+
3L	3154595	3154626	FBgn0263108	+
3L	3196885	3196917	FBgn0001233	+
3L	3196894	3196929	FBgn0001233	+
3L	3196931	3196971	FBgn0001233	+
3L	3196960	3197009	FBgn0001233	+
3L	3221125	3221198	FBgn0035422	-
3L	3221384	3221419	FBgn0035422	-
3L	3221784	3221856	FBgn0035422	-
3L	3221784	3221856	FBgn0035422,FBgn0035422	-
3L	3221798	3221832	FBgn0035422	-
3L	3401160	3401283	FBgn0014388	-
3L	3416131	3416163	FBgn0014388	-
3L	3428724	3428758	FBgn0026259	-
3L	3471618	3471650	FBgn0052267	-
3L	3593801	3593883	FBgn0005640	+
3L	3593801	3593883	FBgn0005640,FBgn0005640	+
3L	3593804	3593880	FBgn0005640	+
3L	3593804	3593880	FBgn0005640,FBgn0005640	+
3L	3593814	3593853	FBgn0005640	+
3L	4114301	4114345	FBgn0035499	-
3L	4114315	4114347	FBgn0035499	-
3L	4224090	4224129	FBgn0001257	-
3L	4405226	4405260	FBgn0035541	-
3L	4553388	4553423	FBgn0035558	+
3L	5135754	5135788	FBgn0035592	-
3L	5344302	5344334	FBgn0016031	-
3L	5561871	5561903	FBgn0029118	-
3L	5566939	5566993	FBgn0015766	-
3L	5567138	5567195	FBgn0015766	-
3L	5567285	5567322	FBgn0015766	-
3L	5763356	5763392	FBgn0035630	-
3L	5763389	5763438	FBgn0035630	-
3L	5763407	5763440	FBgn0035630	-
3L	5763492	5763524	FBgn0035630	-
3L	5765010	5765041	FBgn0035630	-
3L	6096400	6096431	FBgn0061492	+
3L	6169552	6169587	FBgn0035688	-
3L	6203840	6203882	FBgn0002526	-
3L	6203879	6203912	FBgn0002526	-
3L	6333477	6333508	FBgn0035699	-
3L	6523832	6523863	FBgn0020251	+
3L	6972829	6972860	FBgn0001104	-
3L	7240223	7240261	FBgn0035753	-
3L	7366992	7367024	FBgn0035772	-
3L	7385464	7385496	FBgn0016983	+
3L	7936953	7936984	FBgn0035827	+
3L	8107989	8108020	FBgn0262579	+
3L	8428611	8428642	FBgn0020224	+
3L	8440183	8440214	FBgn0263352	-
3L	8602281	8602333	FBgn0017579	+
3L	8602296	8602327	FBgn0017579	+
3L	8933125	8933156	FBgn0264305	-
3L	9092016	9092048	FBgn0023479	+
3L	9412686	9412717	FBgn0035987	+
3L	9428824	9428884	FBgn0005533	-
3L	9438616	9438647	FBgn0040305	+
3L	9446285	9446319	FBgn0053926	+
3L	9452542	9452574	FBgn0266124	+
3L	9509893	9509963	FBgn0010408	-
3L	9510736	9510789	FBgn0010408	-
3L	9510736	9510789	FBgn0010408,FBgn0010408	-
3L	9510784	9510816	FBgn0010408	-
3L	9683605	9683636	FBgn0036030	-
3L	9716604	9716637	FBgn0045823	+
3L	9868148	9868179	FBgn0027567	+
3L	11694006	11694037	FBgn0036194	-
3L	11822991	11823025	FBgn0036213	+
3L	11824145	11824195	FBgn0036213	+
3L	13016756	13016790	FBgn0036334	+
3L	13023598	13023629	FBgn0286213	+
3L	13042816	13042853	FBgn0011284	+
3L	13042816	13042853	FBgn0011284,FBgn0011284	+
3L	13043583	13043618	FBgn0011284	+
3L	13043827	13043890	FBgn0011284	+
3L	13043828	13043871	FBgn0011284	+
3L	14070512	14070543	FBgn0267795	+
3L	14070556	14070589	FBgn0267795	+
3L	14070670	14070706	FBgn0267795	+
3L	14070795	14070831	FBgn0267795	+
3L	14416452	14416484	FBgn0087007	-
3L	14540107	14540139	FBgn0026409	+
3L	14796436	14796467	FBgn0036451	+
3L	14818124	14818155	FBgn0036454	+
3L	15134594	15134627	FBgn0036483	-
3L	15134595	15134627	FBgn0036483	-
3L	15160911	15160945	FBgn0036489	-
3L	15560958	15561014	FBgn0087035	+
3L	15960875	15960907	FBgn0263599	-
3L	16038420	16038451	FBgn0260635	-
3L	16676473	16676504	FBgn0264605	-
3L	16676473	16676504	FBgn0264605,FBgn0063485	-
3L	16785277	16785311	FBgn0025582	-
3L	16807058	16807090	FBgn0036663	-
3L	17495242	17495273	FBgn0036732	+
3L	17495242	17495273	FBgn0036732,FBgn0052185	+
3L	17620137	17620169	FBgn0036740	-
3L	17638198	17638233	FBgn0004401	-
3L	17638440	17638472	FBgn0004401	-
3L	17798039	17798071	FBgn0052190	-
3L	18893146	18893181	FBgn0036824	-
3L	18896401	18896435	FBgn0036824	-
3L	18899766	18899798	FBgn0036825	+
3L	18899801	18899834	FBgn0036825	+
3L	18899801	18899868	FBgn0036825	+
3L	19257431	19257465	FBgn0026630	-
3L	19608238	19608269	FBgn0036892	-
3L	19798913	19798949	FBgn0261283	+
3L	19918076	19918107	FBgn0028695	+
3L	19932827	19932864	FBgn0036921	+
3L	20002219	20002252	FBgn0036928	+
3L	20243511	20243543	FBgn0036959	+
3L	20243511	20243543	FBgn0036959,FBgn0024814	+
3L	20510806	20510839	FBgn0052425	+
3L	20773271	20773302	FBgn0016696	+
3L	21133298	21133329	FBgn0037051	-
3L	21208043	21208075	FBgn0037057	+
3L	21218445	21218476	FBgn0028427	+
3L	21338220	21338251	FBgn0037074	-
3L	21493805	21493839	FBgn0037087	+
3L	21497269	21497300	FBgn0015239	-
3L	21540425	21540456	FBgn0028663	+
3L	21834160	21834191	FBgn0037137	+
3L	22076685	22076720	FBgn0000100	+
3L	22076935	22076968	FBgn0000100	+
3L	22076935	22076970	FBgn0000100	+
3L	22077410	22077457	FBgn0000100	+
3L	22294148	22294181	FBgn0004449	-
3L	22333768	22333799	FBgn0004449	-
3L	22867515	22867550	FBgn0037199	-
3L	22869568	22869607	FBgn0010348	-
3L	23093640	23093735	FBgn0024733	-
3L	23093728	23093764	FBgn0024733	-
3L	23093776	23093812	FBgn0024733	-
3L	23094827	23094859	FBgn0024733	-
3L	23094999	23095034	FBgn0024733	-
3L	23095076	23095110	FBgn0024733	-
3L	23341437	23341470	FBgn0052230	+
3L	23341525	23341557	FBgn0052230	+
3L	25121243	25121279	FBgn0260008	+
3L	27267364	27267398	FBgn0028697	+
3L	27267618	27267651	FBgn0028697	+
3L	27267770	27267806	FBgn0028697	+
3L	27267770	27267806	FBgn0028697	+
3L	27268389	27268428	FBgn0028697	+
3L	27268393	27268425	FBgn0028697	+
3L	27293587	27293618	FBgn0024804	+
3R	1295730	1295761	FBgn0267431	+
3R	2086881	2086912	FBgn0267431	+
3R	4240972	4241037	FBgn0010225	+
3R	4268048	4268090	FBgn0037228	+
3R	4268185	4268218	FBgn0037228	+
3R	4268208	4268252	FBgn0037228	+
3R	4407066	4407098	FBgn0263594	+
3R	4441252	4441283	FBgn0037252	+
3R	4654282	4654315	FBgn0087013	+
3R	4713152	4713190	FBgn0037270	-
3R	4714066	4714098	FBgn0037270	-
3R	4924224	4924256	FBgn0265082	+
3R	5465633	5465671	FBgn0037328	-
3R	5465678	5465713	FBgn0037328	-
3R	5480144	5480176	FBgn0015402	-
3R	5559951	5559991	FBgn0037339	-
3R	5559951	5559991	FBgn0037339,FBgn0037339	-
3R	5595908	5595941	FBgn0250753	-
3R	5596216	5596249	FBgn0250753	-
3R	5596241	5596277	FBgn0250753	-
3R	5596241	5596277	FBgn0250753,FBgn0250753	-
3R	5596275	5596316	FBgn0250753	-
3R	5596375	5596409	FBgn0250753	-
3R	5596423	5596484	FBgn0250753	-
3R	5596423	5596484	FBgn0250753,FBgn0250753	-
3R	5596447	5596483	FBgn0250753	-
3R	5596559	5596594	FBgn0250753	-
3R	5596571	5596604	FBgn0250753	-
3R	5596979	5597012	FBgn0250753	-
3R	5597439	5597472	FBgn0250753	-
3R	5597609	5597644	FBgn0250753	-
3R	5598028	5598060	FBgn0250753	-
3R	5598057	5598088	FBgn0250753	-
3R	5598105	5598167	FBgn0250753	-
3R	5624876	5624913	FBgn0037351	+
3R	5625158	5625227	FBgn0037351	+
3R	5625158	5625227	FBgn0037351,FBgn0037351	+
3R	5625864	5625933	FBgn0037351	+
3R	5788987	5789018	FBgn0037376	-
3R	6000448	6000479	FBgn0003261	-
3R	6457207	6457241	FBgn0037446	+
3R	6765010	6765057	FBgn0000071	+
3R	6765058	6765097	FBgn0000071	+
3R	7077694	7077746	FBgn0037468	+
3R	7088693	7088739	FBgn0003884	+
3R	7088753	7088817	FBgn0003884	+
3R	7487225	7487256	FBgn0015569	-
3R	7889303	7889335	FBgn0037529	-
3R	7921998	7922030	FBgn0002542	+
3R	8219683	8219724	FBgn0037552	+
3R	8304480	8304511	FBgn0265101	-
3R	8661492	8661524	FBgn0086679	-
3R	8753978	8754010	FBgn0037624	+
3R	8942528	8942563	FBgn0037643	+
3R	8982745	8982779	FBgn0037647	-
3R	9262514	9262549	FBgn0037671	+
3R	9354286	9354320	FBgn0266410	+
3R	9400373	9400426	FBgn0037686	-
3R	9400374	9400408	FBgn0037686	-
3R	9400414	9400451	FBgn0037686	-
3R	9400828	9400862	FBgn0037686	-
3R	9505873	9505908	FBgn0267790	-
3R	9511590	9511621	FBgn0003205	-
3R	9548662	9548693	FBgn0037705	-
3R	9575038	9575070	FBgn0027338	-
3R	9628947	9628980	FBgn0005585	-
3R	9628992	9629030	FBgn0005585	-
3R	9778084	9778131	FBgn0261599	+
3R	9778644	9778677	FBgn0261599	+
3R	9778782	9778840	FBgn0261599	+
3R	9778802	9778836	FBgn0261599	+
3R	9778984	9779042	FBgn0261599	+
3R	9793052	9793085	FBgn0037756	+
3R	10340805	10340840	FBgn0037811	+
3R	11211049	11211084	FBgn0037874	+
3R	11211093	11211129	FBgn0037874	+
3R	11215421	11215459	FBgn0086472	-
3R	11215456	11215509	FBgn0086472	-
3R	11215466	11215502	FBgn0086472	-
3R	11215501	11215579	FBgn0086472	-
3R	11215511	11215553	FBgn0086472	-
3R	11215594	11215630	FBgn0086472	-
3R	11222428	11222466	FBgn0020910	+
3R	11222821	11222854	FBgn0020910	+
3R	11224879	11224917	FBgn0020910	+
3R	11569247	11569279	FBgn0263316	+
3R	11590438	11590475	FBgn0051363	-
3R	11674825	11674860	FBgn0037930	+
3R	11674850	11674885	FBgn0037930	+
3R	11752499	11752553	FBgn0017581	-
3R	11756334	11756365	FBgn0017581	-
3R	11789352	11789387	FBgn0025802	-
3R	11820177	11820209	FBgn0019624	+
3R	12367871	12367905	FBgn0001149	-
3R	12676831	12676862	FBgn0026207	-
3R	13026362	13026394	FBgn0283438	-
3R	13637745	13637790	FBgn0263396	-
3R	13638222	13638255	FBgn0263396	-
3R	13638805	13638841	FBgn0263396	-
3R	13639529	13639561	FBgn0263396	-
3R	13640206	13640239	FBgn0263396	-
3R	13641480	13641518	FBgn0263396	-
3R	13642031	13642064	FBgn0263396	-
3R	13666562	13666594	FBgn0004587	+
3R	14626526	14626560	FBgn0013981	+
3R	14732415	14732449	FBgn0011217	-
3R	15203115	15203147	FBgn0028984	-
3R	15225830	15225863	FBgn0263979	+
3R	15241651	15241682	FBgn0045035	-
3R	15246521	15246591	FBgn0266599	+
3R	15246554	15246585	FBgn0266599	+
3R	15258392	15258423	FBgn0263740	-
3R	15359679	15359711	FBgn0026634	-
3R	16003996	16004027	FBgn0003507	+
3R	16004029	16004060	FBgn0003507	+
3R	16350727	16350763	FBgn0027095	+
3R	16458449	16458481	FBgn0250754	-
3R	16645066	16645102	FBgn0038453	+
3R	18288936	18288969	FBgn0010877	-
3R	19646858	19646891	FBgn0038722	+
3R	19852998	19853029	FBgn0038735	+
3R	19862667	19862698	FBgn0038738	-
3R	20807136	20807167	FBgn0038826	+
3R	20822169	20822203	FBgn0019936	+
3R	20822903	20822936	FBgn0019936	+
3R	20822903	20822939	FBgn0019936	+
3R	20822904	20822936	FBgn0019936	+
3R	20822930	20823041	FBgn0019936	+
3R	20822930	20823041	FBgn0019936,FBgn0019936	+
3R	20822934	20822967	FBgn0019936	+
3R	20822964	20823038	FBgn0019936	+
3R	20822964	20823038	FBgn0019936,FBgn0019936	+
3R	20822971	20823035	FBgn0019936	+
3R	20822971	20823035	FBgn0019936,FBgn0019936	+
3R	20823223	20823284	FBgn0019936	+
3R	20823241	20823285	FBgn0019936	+
3R	20823245	20823277	FBgn0019936	+
3R	20824685	20824721	FBgn0027493	-
3R	20851113	20851146	FBgn0038834	+
3R	20851360	20851413	FBgn0038834	+
3R	20912747	20912781	FBgn0051191	-
3R	20912781	20912818	FBgn0051191	-
3R	20912781	20912818	FBgn0051191,FBgn0051191	-
3R	20912787	20912819	FBgn0051191	-
3R	20912822	20912888	FBgn0051191	-
3R	21069386	21069420	FBgn0000083	+
3R	21069601	21069635	FBgn0000083	+
3R	21110776	21110810	FBgn0028468	+
3R	21271020	21271051	FBgn0038876	+
3R	21375355	21375387	FBgn0002781	-
3R	22036372	22036404	FBgn0266581	+
3R	22036372	22036405	FBgn0266581	+
3R	22419650	22419681	FBgn0038964	-
3R	22440238	22440270	FBgn0038968	-
3R	22489108	22489140	FBgn0003676	-
3R	22544326	22544357	FBgn0038984	-
3R	23197467	23197499	FBgn0262975	-
3R	23358176	23358209	FBgn0024509	+
3R	23358798	23358833	FBgn0002622	+
3R	23359398	23359432	FBgn0002622	+
3R	23359845	23359882	FBgn0002622	+
3R	23359901	23359937	FBgn0002622	+
3R	24167681	24167715	FBgn0039160	-
3R	24237203	24237236	FBgn0043884	+
3R	24237204	24237239	FBgn0043884	+
3R	24237204	24237239	FBgn0043884,FBgn0043884	+
3R	24248777	24248808	FBgn0043884	+
3R	24854745	24854779	FBgn0039234	+
3R	25040396	25040428	FBgn0045866	+
3R	25246294	25246329	FBgn0039300	-
3R	25255573	25255604	FBgn0039302	+
3R	25684020	25684062	FBgn0039359	-
3R	26049872	26049903	FBgn0266668	-
3R	26715536	26715567	FBgn0039449	-
3R	26869269	26869305	FBgn0026562	-
3R	27065000	27065039	FBgn0003495	-
3R	27924778	27924814	FBgn0003279	+
3R	27924801	27924846	FBgn0003279	+
3R	27952059	27952098	FBgn0039562	+
3R	28424675	28424706	FBgn0039584	+
3R	28601724	28601762	FBgn0001215	+
3R	28602427	28602461	FBgn0001215	+
3R	28602427	28602462	FBgn0001215	+
3R	28602427	28602462	FBgn0001215,FBgn0001215	+
3R	28604752	28604784	FBgn0001215	+
3R	28605026	28605060	FBgn0001215	+
3R	28812506	28812539	FBgn0039600	+
3R	28812533	28812564	FBgn0039600	+
3R	28812533	28812584	FBgn0039600	+
3R	29127946	29127978	FBgn0039637	+
3R	29137908	29137958	FBgn0028671	+
3R	29724133	29724165	FBgn0024841	+
3R	29747711	29747744	FBgn0020235	-
3R	29801735	29801767	FBgn0039697	-
3R	29862606	29862642	FBgn0039713	+
3R	29863213	29863251	FBgn0039713	+
3R	29863214	29863249	FBgn0039713	+
3R	29863246	29863318	FBgn0039713	+
3R	29863246	29863318	FBgn0039713,FBgn0039713	+
3R	29863247	29863304	FBgn0039713	+
3R	29863248	29863324	FBgn0039713	+
3R	29863248	29863324	FBgn0039713,FBgn0039713	+
3R	29863442	29863478	FBgn0039713	+
3R	29863710	29863744	FBgn0039714	-
3R	29863766	29863801	FBgn0039714	-
3R	30004981	30005012	FBgn0016685	+
3R	30010065	30010102	FBgn0016685	+
3R	30010096	30010127	FBgn0016685	+
3R	30010251	30010284	FBgn0016685	+
3R	30045238	30045302	FBgn0002626	-
3R	30206548	30206602	FBgn0039757	-
3R	30206556	30206590	FBgn0039757	-
3R	30206620	30206656	FBgn0039757	-
3R	30206832	30206865	FBgn0039757	-
3R	30206833	30206865	FBgn0039757	-
3R	30207337	30207371	FBgn0039757	-
3R	30207779	30207830	FBgn0039757	-
3R	30359619	30359650	FBgn0010113	+
3R	30385581	30385642	FBgn0015222	-
3R	30593165	30593196	FBgn0039790	-
3R	30883487	30883526	FBgn0000416	-
3R	30883526	30883561	FBgn0000416	-
3R	30883682	30883716	FBgn0000416	-
3R	30883739	30883772	FBgn0000416	-
3R	30886228	30886262	FBgn0000416	-
3R	30888690	30888725	FBgn0000416	-
3R	31216994	31217028	FBgn0039830	-
3R	31217536	31217572	FBgn0039830	-
3R	31217538	31217573	FBgn0039830	-
3R	31594822	31594908	FBgn0039857	-
3R	31594904	31594936	FBgn0039857	-
3R	31596161	31596196	FBgn0039857	-
3R	31745225	31745259	FBgn0000150	-
3R	31751244	31751275	FBgn0022349	+
3R	31938617	31938648	FBgn0011224	-
3R	31954500	31954531	FBgn0011224	-
3R	32048116	32048147	FBgn0040206	-
3R	32054864	32054898	FBgn0002780	+
3R	32054907	32054941	FBgn0002780	+
4	65623	65656	FBgn0017545	-
4	66212	66261	FBgn0017545	-
4	66314	66354	FBgn0017545	-
4	539203	539234	FBgn0004607	+
4	1020023	1020054	FBgn0025741	-
4	1037171	1037202	FBgn0264607	-
4	1219152	1219183	FBgn0263112	+
mitochondrion_genome	1507	1544	FBgn0013674	+
mitochondrion_genome	2732	2770	FBgn0013674	+
mitochondrion_genome	2735	2773	FBgn0013674	+
mitochondrion_genome	2857	2895	FBgn0013674	+
mitochondrion_genome	2913	2984	FBgn0013674	+
mitochondrion_genome	2937	2969	FBgn0013674	+
mitochondrion_genome	3637	3673	FBgn0013675	+
mitochondrion_genome	3679	3734	FBgn0013675	+
mitochondrion_genome	4448	4485	FBgn0013672	+
mitochondrion_genome	4673	4713	FBgn0013672	+
mitochondrion_genome	5307	5343	FBgn0013676	+
mitochondrion_genome	5446	5481	FBgn0013676	+
mitochondrion_genome	5470	5523	FBgn0013676	+
mitochondrion_genome	8243	8279	FBgn0262952	-
mitochondrion_genome	8575	8612	FBgn0262952	-
mitochondrion_genome	9144	9183	FBgn0262952	-
X	624779	624816	FBgn0026879	-
X	628364	628416	FBgn0002579	-
X	628382	628417	FBgn0002579	-
X	648093	648128	FBgn0025638	+
X	763980	764014	FBgn0015288	-
X	764007	764040	FBgn0015288	-
X	764032	764098	FBgn0015288	-
X	764032	764098	FBgn0015288,FBgn0015288	-
X	937738	937772	FBgn0052815	+
X	937738	937772	FBgn0052815,FBgn0040340	+
X	1121148	1121180	FBgn0040397	-
X	1375933	1375964	FBgn0023169	+
X	1481804	1481841	FBgn0003517	-
X	1866705	1866736	FBgn0026873	+
X	1872422	1872458	FBgn0023517	-
X	1881327	1881360	FBgn0023518	-
X	1891483	1891518	FBgn0000117	-
X	2092998	2093031	FBgn0040395	+
X	2115754	2115785	FBgn0004860	-
X	2148452	2148484	FBgn0004654	+
X	2293376	2293407	FBgn0023526	-
X	2444275	2444306	FBgn0040388	-
X	2609263	2609295	FBgn0029629	-
X	2743795	2743826	FBgn0024980	-
X	3171303	3171337	FBgn0004647	+
X	3545760	3545793	FBgn0052791	-
X	3545761	3545793	FBgn0052791	-
X	3545762	3545793	FBgn0052791	-
X	3545792	3545844	FBgn0052791	-
X	3545792	3545844	FBgn0052791,FBgn0052791	-
X	3545795	3545840	FBgn0052791	-
X	3545808	3545840	FBgn0052791	-
X	3933467	3933498	FBgn0029685	-
X	4110215	4110248	FBgn0026084	+
X	4407503	4407536	FBgn0052773	-
X	4457149	4457182	FBgn0052773	-
X	4542457	4542488	FBgn0029709	+
X	4553220	4553253	FBgn0052773	-
X	4553241	4553273	FBgn0052773	-
X	4699382	4699415	FBgn0011760	+
X	4854418	4854451	FBgn0260971	+
X	5088620	5088651	FBgn0029746	+
X	5088620	5088651	FBgn0029746,FBgn0266098	+
X	5619156	5619190	FBgn0004687	-
X	5672808	5672844	FBgn0029785	+
X	5673447	5673486	FBgn0029785	+
X	5673478	5673533	FBgn0029785	+
X	5760404	5760435	FBgn0013987	-
X	5900843	5900883	FBgn0000042	+
X	5900863	5900898	FBgn0000042	+
X	5904381	5904434	FBgn0000042	+
X	6531020	6531074	FBgn0014026	-
X	6653134	6653165	FBgn0029882	-
X	6670571	6670602	FBgn0029887	-
X	6741689	6741724	FBgn0029897	-
X	6741749	6741798	FBgn0029897	-
X	7308005	7308036	FBgn0024250	+
X	7609260	7609292	FBgn0004198	+
X	7739922	7739954	FBgn0016041	+
X	7899700	7899736	FBgn0261592	-
X	7899700	7899736	FBgn0261592,FBgn0261592	-
X	7901259	7901292	FBgn0261592	-
X	7934605	7934639	FBgn0004403	+
X	7934606	7934638	FBgn0004403	+
X	8038870	8038904	FBgn0004656	-
X	8069883	8069916	FBgn0004657	+
X	8070176	8070210	FBgn0004657	+
X	8417261	8417296	FBgn0261793	+
X	8417263	8417296	FBgn0261793	+
X	8462164	8462195	FBgn0023506	+
X	8712421	8712456	FBgn0041629	+
X	9071356	9071410	FBgn0030078	-
X	9071356	9071410	FBgn0030078,FBgn0265413	-
X	9071495	9071526	FBgn0265413	-
X	9153928	9153963	FBgn0004828	-
X	9154026	9154060	FBgn0004828	-
X	9169574	9169618	FBgn0026206	+
X	9169614	9169647	FBgn0026206	+
X	9169666	9169699	FBgn0026206	+
X	9169691	9169753	FBgn0026206	+
X	9169695	9169743	FBgn0026206	+
X	9169747	9169869	FBgn0026206	+
X	9169772	9169806	FBgn0026206	+
X	9169860	9169900	FBgn0026206	+
X	9169867	9169957	FBgn0026206	+
X	9169878	9169912	FBgn0026206	+
X	9169926	9169959	FBgn0026206	+
X	9170043	9170076	FBgn0026206	+
X	9170043	9170076	FBgn0026206	+
X	9170078	9170111	FBgn0026206	+
X	9170085	9170117	FBgn0026206	+
X	9170085	9170202	FBgn0026206	+
X	9170290	9170485	FBgn0026206	+
X	9170291	9170340	FBgn0026206	+
X	9170292	9170326	FBgn0026206	+
X	9170398	9170436	FBgn0026206	+
X	9170404	9170440	FBgn0026206	+
X	9170684	9170726	FBgn0026206	+
X	9170721	9170754	FBgn0026206	+
X	9170757	9170796	FBgn0026206	+
X	9358649	9358699	FBgn0261260	-
X	9359440	9359474	FBgn0261260	-
X	9551154	9551190	FBgn0028327	-
X	9551208	9551243	FBgn0028327	-
X	9554610	9554677	FBgn0030136	+
X	9554611	9554648	FBgn0030136	+
X	9554673	9554708	FBgn0030136	+
X	9554674	9554709	FBgn0030136	+
X	9554980	9555014	FBgn0030136	+
X	9555022	9555059	FBgn0030136	+
X	9555025	9555059	FBgn0030136	+
X	9555054	9555094	FBgn0030136	+
X	9555087	9555125	FBgn0030136	+
X	10042121	10042152	FBgn0263132	+
X	10267244	10267275	FBgn0259170	-
X	10316260	10316292	FBgn0259170	-
X	10781252	10781283	FBgn0025111	-
X	10786821	10786854	FBgn0025111	-
X	11112255	11112294	FBgn0015245	+
X	11145333	11145366	FBgn0020255	-
X	11154453	11154484	FBgn0030276	+
X	11791066	11791097	FBgn0030334	+
X	11792175	11792206	FBgn0030334	+
X	11793101	11793132	FBgn0000259	+
X	11801729	11801764	FBgn0001218	-
X	11864442	11864474	FBgn0030343	+
X	12757790	12757824	FBgn0020513	-
X	13264387	13264420	FBgn0041210	-
X	13265692	13265723	FBgn0041210	-
X	13331913	13331946	FBgn0040309	+
X	13331943	13331977	FBgn0040309	+
X	13335804	13335838	FBgn0010198	-
X	13335860	13335893	FBgn0010198	-
X	13335861	13335894	FBgn0010198	-
X	13741044	13741078	FBgn0030519	+
X	13746124	13746156	FBgn0030520	-
X	13754612	13754643	FBgn0030520	-
X	13807576	13807610	FBgn0261244	+
X	13822199	13822231	FBgn0030529	-
X	13830790	13830821	FBgn0052626	-
X	15138630	15138666	FBgn0030616	-
X	15139330	15139366	FBgn0030616	-
X	15604064	15604095	FBgn0003463	-
X	15752048	15752081	FBgn0030685	-
X	15847950	15847983	FBgn0014391	-
X	15904640	15904671	FBgn0003392	+
X	15950002	15950034	FBgn0259110	-
X	15950003	15950034	FBgn0259110	-
X	16293332	16293363	FBgn0285954	+
X	16317713	16317747	FBgn0004432	-
X	16318093	16318128	FBgn0004432	-
X	16321630	16321664	FBgn0030740	-
X	16334500	16334532	FBgn0278608	+
X	16638844	16638903	FBgn0010412	+
X	16693991	16694022	FBgn0259923	-
X	16826005	16826036	FBgn0030796	+
X	16938084	16938115	FBgn0027556	+
X	17143604	17143683	FBgn0002590	-
X	17143634	17143670	FBgn0002590	-
X	17143680	17143724	FBgn0002590	-
X	17143722	17143756	FBgn0002590	-
X	17147162	17147197	FBgn0002590	-
X	17148221	17148273	FBgn0002590	-
X	17482193	17482225	FBgn0263706	-
X	17633847	17633878	FBgn0030854	-
X	18088349	18088380	FBgn0030891	+
X	18092793	18092824	FBgn0021765	+
X	18935066	18935099	FBgn0264090	+
X	19181600	19181632	FBgn0030991	+
X	19190129	19190163	FBgn0030993	+
X	19598416	19598449	FBgn0285947	+
X	19598949	19599000	FBgn0285947	+
X	20171446	20171477	FBgn0000084	-
X	20254587	20254618	FBgn0015789	+
X	21044037	21044071	FBgn0025814	+
X	21051704	21051738	FBgn0031149	-
X	21051706	21051738	FBgn0031149	-
X	21051707	21051738	FBgn0031149	-
X	21051727	21051784	FBgn0031149	-
X	21078584	21078616	FBgn0031150	+
X	21372500	21372532	FBgn0024251	+
X	21372500	21372532	FBgn0024251,FBgn0024182	+
X	22836986	22837017	FBgn0000719	-
X	23012164	23012196	FBgn0039966	-
